# Supplementary material for: Development of pyridine based o-aminophenolate zinc complexes as structurally tunable catalysts for CO2 fixation into cyclic carbonates
Source: Royal Society of Chemistry journal article supplement (doi:10.1039/c7nj01656e), 2017-01-01
Supplement: c7nj01656e1.pdf [file c7nj01656e1.pdf]

## Electronic Supporting Information

# Development of Pyridine Based *o*-Aminophenolate Zinc Complexes as Structurally Tunable Catalysts for CO<sub>2</sub> Fixation into Cyclic Carbonates

Zahra Alaji,<sup>a</sup> Elham Safaei,<sup>\* a,b</sup> Andrzej Wojtczak<sup>c</sup>

<sup>a</sup>Institute for Advanced Studies in Basic Sciences (IASBS), 45137-66731, Zanjan, Iran

<sup>b</sup>Department of Chemistry, College of Sciences, Shiraz University, 71454, Shiraz, Iran

<sup>c</sup>Nicolaus Copernicus University, Faculty of Chemistry, 87-100 Torun, Poland.

Email: [e.safaei@shirazu.ac.ir](mailto:e.safaei@shirazu.ac.ir)

## Content

|                                                                                                                                                                                                                                                                                                                                                                     |                |
|---------------------------------------------------------------------------------------------------------------------------------------------------------------------------------------------------------------------------------------------------------------------------------------------------------------------------------------------------------------------|----------------|
| <b>Figure S1.</b> Space filling representation of ZnL <sup>APIP</sup> X (X = OAc, Br, I, Cl).....                                                                                                                                                                                                                                                                   | <b>S3</b>      |
| <b>X-Ray Crystallography data of ZnL<sup>APIP</sup>X (X = OAc, Br, I, Cl) .....</b>                                                                                                                                                                                                                                                                                 | <b>S4-S7</b>   |
| <b>Figure S2.</b> GPC analysis of Styrene Carbonate reaction mixture relevant to table 4 entry 12 showing no polymer chain .....                                                                                                                                                                                                                                    | <b>S8</b>      |
| <b>Figure S3.</b> GPC analysis of <b>a)</b> typical polyether of cyclohexane oxide identified by <sup>1</sup> H NMR, <b>b)</b> Cyclohexane carbonate reaction mixture (Table 5, entries 6-10), <b>c)</b> Overlap spectra of <b>(a)</b> (blue) and <b>(b)</b> (black), <b>d)</b> Cyclohexane carbonate reaction catalyzed by TBAI relevant to table 5, entry 11..... | <b>S8</b>      |
| <b>Figure S4.</b> <sup>1</sup> H NMR spectrum of the cyclohexane oxide polyether chain (broad signal at δ = 3.45 ppm) (It was isolated by crystallization in THF in -1 °C).....                                                                                                                                                                                     | <b>S9</b>      |
| <b>Figure S5.</b> FT-IR of ZnL <sup>APIP</sup> OAc .....                                                                                                                                                                                                                                                                                                            | <b>S10</b>     |
| <b>Figure S6.</b> <sup>1</sup> H NMR of ZnL <sup>APIP</sup> OAc .....                                                                                                                                                                                                                                                                                               | <b>S10</b>     |
| <b>Figure S7.</b> <sup>13</sup> C NMR of ZnL <sup>APIP</sup> OAc .....                                                                                                                                                                                                                                                                                              | <b>S11</b>     |
| <b>Figure S8.</b> FT-IR of ZnL <sup>APIP</sup> Cl.....                                                                                                                                                                                                                                                                                                              | <b>S11</b>     |
| <b>Figure S9.</b> <sup>1</sup> H NMR of ZnL <sup>APIP</sup> Cl.....                                                                                                                                                                                                                                                                                                 | <b>S12</b>     |
| <b>Figure S10.</b> <sup>13</sup> C NMR of ZnL <sup>APIP</sup> Cl.....                                                                                                                                                                                                                                                                                               | <b>S12</b>     |
| <b>Figure S11.</b> MALDI-MS of ZnL <sup>APIP</sup> Cl .....                                                                                                                                                                                                                                                                                                         | <b>S13</b>     |
| <b>Figure S12.</b> FT-IR of ZnL <sup>APIP</sup> Br.....                                                                                                                                                                                                                                                                                                             | <b>S13</b>     |
| <b>Figure S13.</b> <sup>1</sup> H NMR of ZnL <sup>APIP</sup> Br.....                                                                                                                                                                                                                                                                                                | <b>S14</b>     |
| <b>Figure S14.</b> <sup>13</sup> C NMR of ZnL <sup>APIP</sup> Br .....                                                                                                                                                                                                                                                                                              | <b>S14</b>     |
| <b>Figure S15.</b> MALDI-MS of ZnL <sup>APIP</sup> Br .....                                                                                                                                                                                                                                                                                                         | <b>S15</b>     |
| <b>Figure S16.</b> FT-IR of ZnL <sup>APIP</sup> I .....                                                                                                                                                                                                                                                                                                             | <b>S15</b>     |
| <b>Figure S17.</b> <sup>1</sup> H NMR of ZnL <sup>APIP</sup> I .....                                                                                                                                                                                                                                                                                                | <b>S16</b>     |
| <b>Figure S18.</b> <sup>13</sup> C NMR of ZnL <sup>APIP</sup> I .....                                                                                                                                                                                                                                                                                               | <b>S16</b>     |
| <b>Figure S19.</b> MALDI-MS of ZnL <sup>APIP</sup> I .....                                                                                                                                                                                                                                                                                                          | <b>S17</b>     |
| <b>Figure S20.</b> <sup>1</sup> H NMR, <sup>13</sup> C NMR and FTIR-spectra of cyclic carbonates .....                                                                                                                                                                                                                                                              | <b>S18-S49</b> |

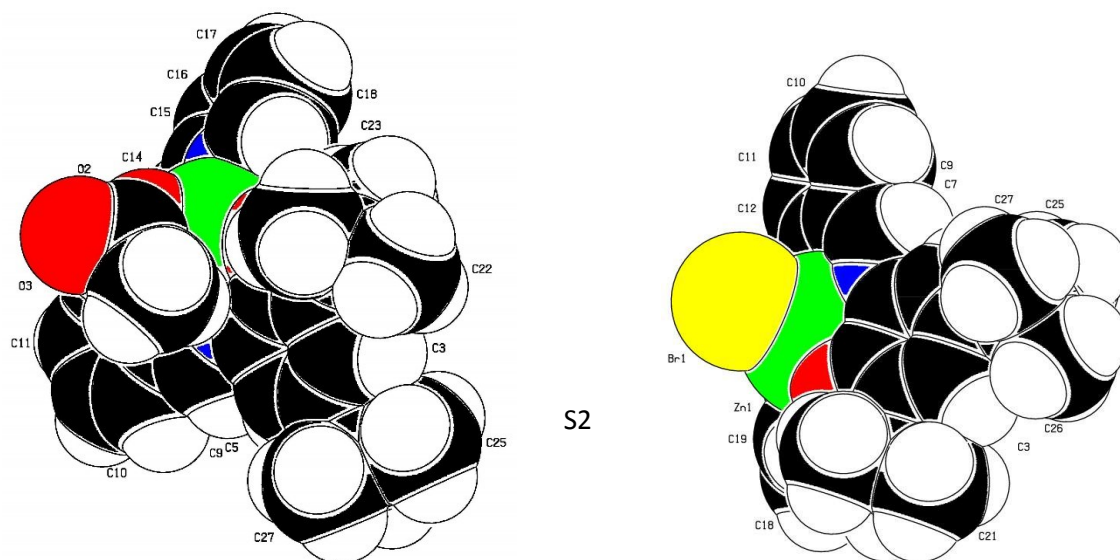

ZnL<sup>APIP</sup>-OAc

ZnL<sup>APIP</sup>-Br

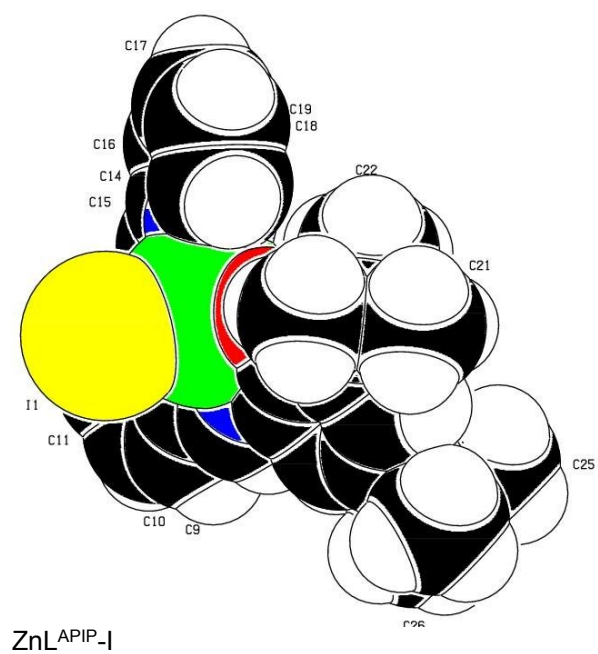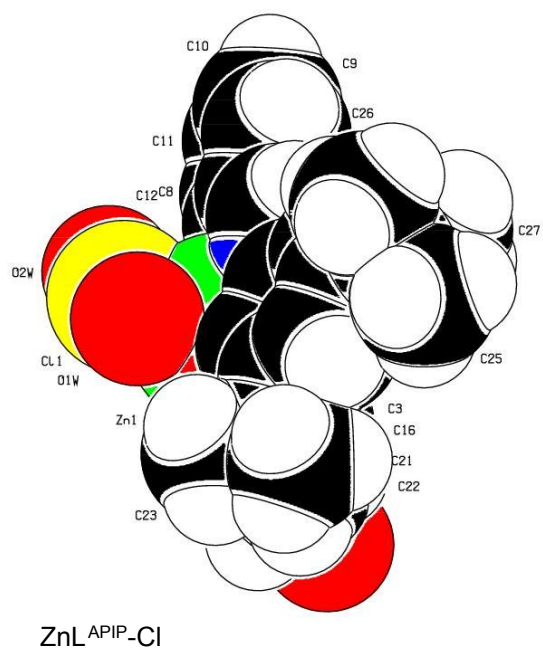

**Figure S1.** Space filling representation of ZnL<sup>APIP</sup>X (X = OAc, Br, I, Cl)

**X-Ray Crystallography data of ZnL<sup>APIP</sup>X (X = OAc, Br, I)**

In all complexes, the coordination sphere  $ZnN_3OX$  has a geometry of a distorted square pyramid, but  $\tau$  parameters [1] of 0.31, 0.32 and 0.17 indicate the polyhedron being an intermediate between the square pyramid (SP) and the trigonal bipyramid (TB), with the deformation towards TB being smallest in  $ZnL^{APIPI}$ . The valence geometry of the  $L^{APIP}$  ligand found in  $ZnL^{APIPOAc}$ ,  $ZnL^{APIPBr}$  and  $ZnL^{APIPI}$  is typical for such systems. However, the difference is found between the imine bond lengths with that involving N2 being significantly longer than that formed by N1. That difference in the bond lengths being the largest for acetate complex  $ZnL^{APIPOAc}$  and the smallest for iodide complex  $ZnL^{APIPI}$ . That also reflects the internal strain imposed by the rigidity of the four-dentate  $L^{APIP}$  ligand.

With the four-dentate coordination, the  $L^{APIP}$  ligand is not flat. In  $ZnL^{APIPOAc}$ , the dihedral angles between C1--C6 (R1), C8--C13 (R2) and C15--N3 (R3) rings being R1-R2 18.1(3), R2-R3 30.7(2) and R1-R3 46.3(2)°. The dihedral angles between these ring planes and the  $N_3O_1$  plane of the pyramid base are 24.8(2), 12.5(3) and 21.7(2)°, respectively. The dihedral angle between the best plane of acetate ligand and the  $N_3O_1$  pyramid base plane is 85.1(2)°, but the acetate is slightly tilted towards N1 and O1, with the Zn1-O2-C28 angle being 129.3(4)°. The  $L^{APIP}$  conformation can be described with the torsion angles C1-C6-N1-C7 177.6(4)°, N1-C7-C8-C13 -13.9(7)° and C8-C13-N2-C14 -149.8(4)°. In  $ZnL^{APIPBr}$ , the significant effect of the bulk imposed by Br ligand is clearly visible. The dihedral angles R1-R2, R2-R3 and R1-R3 are 30.03(14), 37.74(15) and 65.05(14)° and are larger than these found in  $ZnL^{APIPOAc}$ . In  $ZnL^{APIPI}$ , the corresponding angles are 17.40(11), 31.55(12) and 47.07(11)°, almost identical to those in  $ZnL^{APIPOAc}$ . The reason for this similarity seems to be a Zn-I bond being the longest among the reported structures, and therefore minimizing the bulk of the axial ligand. In  $ZnL^{APIPBr}$ , angles between the  $N_3O_1$  plane of the pyramid base and R1, R2 and R3 are 33.58(9), 13.7(1) and 31.7(1)°, respectively, and these values are again larger than these reported for  $ZnL^{APIPOAc}$ . In  $ZnL^{APIPI}$ , the corresponding angles are 25.11(9), 11.4(1) and 21.96(8)°.

The intramolecular Cg...Cg distances between the gravity centers of Zn1-O1-C1-C6-N1 chelate and N3--C19 pyridine rings as well as between Zn1-N2-C14-C15-N3 and C1--C6 phenolic rings are 4.675(3), 5.413(3) Å for  $ZnL^{APIPOAc}$ , 4.5044(16), 5.1743(15) Å in  $ZnL^{APIPBr}$  and 4.6447(13), 5.2968(13) Å for  $ZnL^{APIPI}$ . These data indicate that the internal strain seems to be the largest for the Br complex  $ZnL^{APIPBr}$ . Analysis of the crystal packing of complexes revealed some intermolecular C-H... $\pi$  interactions.

Table S1. Bond lengths [Å] and angles [°] for  $ZnL^{APIPOAc}$

| Bonds   |          | Angles      |            |
|---------|----------|-------------|------------|
| Zn1-O1  | 1.978(3) | O1-Zn1-O2   | 111.95(14) |
| Zn1-O2  | 1.991(4) | O1-Zn1-N1   | 81.73(12)  |
| Zn1-N1  | 2.087(3) | O2-Zn1-N1   | 117.06(15) |
| Zn1-N3  | 2.109(4) | O1-Zn1-N3   | 96.71(13)  |
| Zn1-N2  | 2.174(3) | O2-Zn1-N3   | 105.45(15) |
| O1-C1   | 1.311(5) | N1-Zn1-N3   | 134.79(14) |
| C1-C2   | 1.431(5) | O1-Zn1-N2   | 153.35(14) |
| C1-C6   | 1.432(5) | O2-Zn1-N2   | 94.67(13)  |
| C2-C3   | 1.392(5) | N1-Zn1-N2   | 85.04(13)  |
| C2-C20  | 1.543(5) | N3-Zn1-N2   | 76.60(13)  |
| C3-C4   | 1.391(6) | C1-O1-Zn1   | 114.7(2)   |
| C4-C5   | 1.390(6) | O1-C1-C2    | 123.0(3)   |
| C4-C24  | 1.546(6) | O1-C1-C6    | 119.8(3)   |
| C5-C6   | 1.386(5) | C2-C1-C6    | 117.1(3)   |
| C6-N1   | 1.426(5) | C3-C2-C1    | 119.1(3)   |
| N1-C7   | 1.281(5) | C3-C2-C20   | 121.3(4)   |
| C7-C8   | 1.471(6) | C1-C2-C20   | 119.6(3)   |
| C8-C9   | 1.394(6) | C4-C3-C2    | 123.5(4)   |
| C8-C13  | 1.428(6) | C5-C4-C3    | 117.5(4)   |
| C9-C10  | 1.390(6) | C5-C4-C24   | 121.5(4)   |
| C10-C11 | 1.364(7) | C3-C4-C24   | 121.1(4)   |
| C11-C12 | 1.383(7) | C6-C5-C4    | 121.8(4)   |
| C12-C13 | 1.394(6) | C5-C6-N1    | 125.2(4)   |
| C13-N2  | 1.419(5) | C5-C6-C1    | 121.1(4)   |
| N2-C14  | 1.249(6) | N1-C6-C1    | 113.6(3)   |
| C14-C15 | 1.465(6) | C7-N1-C6    | 123.5(3)   |
| C15-N3  | 1.354(6) | C7-N1-Zn1   | 126.2(3)   |
| C15-C16 | 1.374(6) | C6-N1-Zn1   | 110.1(2)   |
| C16-C17 | 1.389(7) | N1-C7-C8    | 127.2(4)   |
| C17-C18 | 1.400(8) | C9-C8-C13   | 116.8(4)   |
| C18-C19 | 1.380(7) | C9-C8-C7    | 116.5(4)   |
| C19-N3  | 1.326(6) | C13-C8-C7   | 126.7(4)   |
| C20-C21 | 1.528(7) | C10-C9-C8   | 121.7(4)   |
| C20-C23 | 1.531(7) | C11-C10-C9  | 120.9(4)   |
| C20-C22 | 1.552(6) | C10-C11-C12 | 119.7(4)   |
| C24-C27 | 1.493(9) | C11-C12-C13 | 120.6(4)   |
| C24-C25 | 1.502(7) | C12-C13-N2  | 121.8(4)   |
| C24-C26 | 1.569(8) | C12-C13-C8  | 120.4(4)   |
| O2-C28  | 1.209(7) | N2-C13-C8   | 117.8(4)   |
| C28-O3  | 1.246(7) | C14-N2-C13  | 121.6(4)   |
| C28-C29 | 1.528(9) | C14-N2-Zn1  | 114.3(3)   |
|         |          | C13-N2-Zn1  | 124.0(3)   |
|         |          | N2-C14-C15  | 118.9(4)   |
|         |          | N3-C15-C16  | 122.5(4)   |
|         |          | N3-C15-C14  | 115.5(4)   |
|         |          | C16-C15-C14 | 121.9(4)   |
|         |          | C15-C16-C17 | 118.6(5)   |
|         |          | C16-C17-C18 | 118.7(5)   |
|         |          | C19-C18-C17 | 119.1(5)   |
|         |          | N3-C19-C18  | 122.0(5)   |
|         |          | C19-N3-C15  | 119.2(4)   |
|         |          | C19-N3-Zn1  | 126.4(3)   |
|         |          | C15-N3-Zn1  | 114.4(3)   |
|         |          | C21-C20-C23 | 109.7(4)   |
|         |          | C21-C20-C2  | 108.2(4)   |
|         |          | C23-C20-C2  | 110.4(4)   |
|         |          | C21-C20-C22 | 108.7(4)   |
|         |          | C23-C20-C22 | 108.0(4)   |
|         |          | C2-C20-C22  | 111.9(4)   |
|         |          | C27-C24-C25 | 111.7(6)   |
|         |          | C27-C24-C4  | 109.9(5)   |
|         |          | C25-C24-C4  | 113.4(4)   |
|         |          | C27-C24-C26 | 107.6(6)   |
|         |          | C25-C24-C26 | 105.3(5)   |
|         |          | C4-C24-C26  | 108.6(4)   |
|         |          | C28-O2-Zn1  | 129.3(4)   |
|         |          | O2-C28-O3   | 124.8(6)   |
|         |          | O2-C28-C29  | 118.7(5)   |
|         |          | O3-C28-C29  | 116.5(6)   |

Table S2. Bond lengths [Å] and angles [°] for ZnL<sup>APIP</sup> Br

| Number | Atom1 | Atom2 | Length    | Number | Atom1 | Atom2 | Atom3 | Angle     |
|--------|-------|-------|-----------|--------|-------|-------|-------|-----------|
| 1      | Zn1   | Br1   | 2.4003(5) | 1      | Br1   | Zn1   | O1    | 112.25(7) |
| 2      | Zn1   | O1    | 1.960(2)  | 2      | Br1   | Zn1   | N1    | 111.95(7) |
| 3      | Zn1   | N1    | 2.106(2)  | 3      | Br1   | Zn1   | N2    | 99.24(6)  |
| 4      | Zn1   | N2    | 2.170(2)  | 4      | Br1   | Zn1   | N3    | 116.74(7) |
| 5      | Zn1   | N3    | 2.121(2)  | 5      | O1    | Zn1   | N1    | 81.12(9)  |
| 6      | O1    | C1    | 1.308(3)  | 6      | O1    | Zn1   | N2    | 148.01(9) |
| 7      | C1    | C2    | 1.420(4)  | 7      | O1    | Zn1   | N3    | 93.67(9)  |
| 8      | C1    | C6    | 1.426(3)  | 8      | N1    | Zn1   | N2    | 82.03(9)  |
| 9      | C2    | C3    | 1.378(4)  | 9      | N1    | Zn1   | N3    | 129.02(9) |
| 10     | C2    | C20   | 1.535(4)  | 10     | N2    | Zn1   | N3    | 76.37(9)  |
| 11     | C3    | H3A   | 0.93      | 11     | Zn1   | O1    | C1    | 115.0(2)  |
| 12     | C3    | C4    | 1.405(4)  | 12     | O1    | C1    | C2    | 123.0(2)  |
| 13     | C4    | C5    | 1.378(4)  | 13     | O1    | C1    | C6    | 119.9(2)  |
| 14     | C4    | C24   | 1.530(4)  | 14     | C2    | C1    | C6    | 117.1(2)  |
| 15     | C5    | H5A   | 0.93      | 15     | C1    | C2    | C3    | 118.4(3)  |
| 16     | C5    | C6    | 1.382(4)  | 16     | C1    | C2    | C20   | 119.5(2)  |
| 17     | C6    | N1    | 1.407(3)  | 17     | C3    | C2    | C20   | 122.1(3)  |
| 18     | C7    | H7A   | 0.93      | 18     | C2    | C3    | H3A   | 117.7     |
| 19     | C7    | N1    | 1.290(3)  | 19     | C2    | C3    | C4    | 124.5(3)  |
| 20     | C7    | C8    | 1.461(3)  | 20     | H3A   | C3    | C4    | 117.8     |
| 21     | C8    | C9    | 1.393(4)  | 21     | C3    | C4    | C5    | 116.7(3)  |
| 22     | C8    | C13   | 1.407(3)  | 22     | C3    | C4    | C24   | 122.3(3)  |
| 23     | C9    | H9A   | 0.93      | 23     | C5    | C4    | C24   | 121.1(2)  |
| 24     | C9    | C10   | 1.370(4)  | 24     | C4    | C5    | H5A   | 119.4     |
| 25     | C10   | H10A  | 0.93      | 25     | C4    | C5    | C6    | 121.3(2)  |
| 26     | C10   | C11   | 1.387(5)  | 26     | H5A   | C5    | C6    | 119.4     |
| 27     | C11   | H11A  | 0.93      | 27     | C1    | C6    | C5    | 122.0(2)  |
| 28     | C11   | C12   | 1.378(4)  | 28     | C1    | C6    | N1    | 113.5(2)  |
| 29     | C12   | H12A  | 0.93      | 29     | C5    | C6    | N1    | 124.5(2)  |
| 30     | C12   | C13   | 1.384(4)  | 30     | H7A   | C7    | N1    | 117.3     |
| 31     | C13   | N2    | 1.421(3)  | 31     | H7A   | C7    | C8    | 117.1     |
| 32     | N2    | C14   | 1.271(4)  | 32     | N1    | C7    | C8    | 125.6(2)  |
| 33     | C14   | H14A  | 0.929     | 33     | Zn1   | N1    | C6    | 110.0(2)  |
| 34     | C14   | C15   | 1.468(3)  | 34     | Zn1   | N1    | C7    | 124.9(2)  |
| 35     | C15   | C16   | 1.382(4)  | 35     | C6    | N1    | C7    | 124.3(2)  |
| 36     | C15   | N3    | 1.349(4)  | 36     | C7    | C8    | C9    | 117.0(2)  |
| 37     | C16   | H16A  | 0.93      | 37     | C7    | C8    | C13   | 125.8(2)  |
| 38     | C16   | C17   | 1.382(4)  | 38     | C9    | C8    | C13   | 117.1(2)  |
|        |       |       |           | 39     | C8    | C9    | H9A   | 118.8     |
|        |       |       |           | 40     | C8    | C9    | C10   | 122.5(3)  |
|        |       |       |           | 41     | H9A   | C9    | C10   | 118.7     |
|        |       |       |           | 42     | C9    | C10   | H10A  | 120.3     |
|        |       |       |           | 43     | C9    | C10   | C11   | 119.4(3)  |
|        |       |       |           | 44     | H10A  | C10   | C11   | 120.3     |
|        |       |       |           | 45     | C10   | C11   | H11A  | 120.1     |
|        |       |       |           | 46     | C10   | C11   | C12   | 119.9(3)  |
|        |       |       |           | 47     | H11A  | C11   | C12   | 120       |
|        |       |       |           | 48     | C11   | C12   | H12A  | 119.8     |
|        |       |       |           | 49     | C11   | C12   | C13   | 120.4(3)  |
|        |       |       |           | 50     | H12A  | C12   | C13   | 119.8     |
|        |       |       |           | 51     | C8    | C13   | C12   | 120.7(2)  |
|        |       |       |           | 52     | C8    | C13   | N2    | 118.7(2)  |
|        |       |       |           | 53     | C12   | C13   | N2    | 120.7(2)  |
|        |       |       |           | 54     | Zn1   | N2    | C13   | 122.4(2)  |
|        |       |       |           | 55     | Zn1   | N2    | C14   | 114.4(2)  |
|        |       |       |           | 56     | C13   | N2    | C14   | 123.1(2)  |
|        |       |       |           | 57     | N2    | C14   | H14A  | 120.5     |
|        |       |       |           | 58     | N2    | C14   | C15   | 119.0(3)  |
|        |       |       |           | 59     | H14A  | C14   | C15   | 120.5     |
|        |       |       |           | 60     | C14   | C15   | C16   | 122.6(3)  |
|        |       |       |           | 61     | C14   | C15   | N3    | 114.8(2)  |
|        |       |       |           | 62     | C16   | C15   | N3    | 122.5(3)  |
|        |       |       |           | 63     | C15   | C16   | H16A  | 120.9     |
|        |       |       |           | 64     | C15   | C16   | C17   | 118.3(3)  |
|        |       |       |           | 65     | H16A  | C16   | C17   | 120.8     |
|        |       |       |           | 66     | C16   | C17   | H17A  | 120.3     |
|        |       |       |           | 67     | C16   | C17   | C18   | 119.4(3)  |
|        |       |       |           | 68     | H17A  | C17   | C18   | 120.2     |
|        |       |       |           | 69     | C17   | C18   | H18A  | 120.6     |
|        |       |       |           | 70     | C17   | C18   | C19   | 118.9(3)  |
|        |       |       |           | 71     | H18A  | C18   | C19   | 120.6     |

Table S3. Bond lengths [Å] and angles [°] for ZnL<sup>APIP</sup> I

| Number | Atom1 | Atom2 | Atom3     | Angle |      |     |      |           |
|--------|-------|-------|-----------|-------|------|-----|------|-----------|
|        |       |       |           | 1     | I1   | Zn1 | O1   | 114.73(5) |
|        |       |       |           | 2     | I1   | Zn1 | N1   | 117.60(5) |
| 1      | Zn1   | I1    | 2.5765(4) | 3     | I1   | Zn1 | N2   | 101.16(5) |
| 2      | Zn1   | O1    | 1.962(2)  | 4     | I1   | Zn1 | N3   | 106.81(5) |
| 3      | Zn1   | N1    | 2.116(2)  | 5     | O1   | Zn1 | N1   | 81.23(7)  |
| 4      | Zn1   | N2    | 2.162(2)  | 6     | O1   | Zn1 | N2   | 144.10(7) |
| 5      | Zn1   | N3    | 2.126(2)  | 7     | O1   | Zn1 | N3   | 92.04(7)  |
| 6      | O1    | C1    | 1.318(3)  | 8     | N1   | Zn1 | N2   | 82.99(7)  |
| 7      | C1    | C2    | 1.429(4)  | 9     | N1   | Zn1 | N3   | 133.75(7) |
| 8      | C1    | C6    | 1.413(3)  | 10    | N2   | Zn1 | N3   | 76.22(7)  |
| 9      | C2    | C3    | 1.368(3)  | 11    | Zn1  | O1  | C1   | 114.7(1)  |
| 10     | C2    | C20   | 1.541(3)  | 12    | O1   | C1  | C2   | 121.4(2)  |
| 11     | C3    | H3A   | 0.929     | 13    | O1   | C1  | C6   | 120.7(2)  |
| 12     | C3    | C4    | 1.410(3)  | 14    | C2   | C1  | C6   | 117.8(2)  |
| 13     | C4    | C5    | 1.377(4)  | 15    | C1   | C2  | C3   | 117.8(2)  |
| 14     | C4    | C24   | 1.535(4)  | 16    | C1   | C2  | C20  | 120.0(2)  |
| 15     | C5    | H5A   | 0.93      | 17    | C3   | C2  | C20  | 122.3(2)  |
| 16     | C5    | C6    | 1.390(3)  | 18    | C2   | C3  | H3A  | 117.5     |
| 17     | C6    | N1    | 1.417(3)  | 19    | C2   | C3  | C4   | 124.9(2)  |
| 18     | N1    | C7    | 1.284(3)  | 20    | H3A  | C3  | C4   | 117.6     |
| 19     | C7    | H7A   | 0.93      | 21    | C3   | C4  | C5   | 116.7(2)  |
| 20     | C7    | C8    | 1.459(4)  | 22    | C3   | C4  | C24  | 119.4(2)  |
| 21     | C8    | C9    | 1.398(3)  | 23    | C5   | C4  | C24  | 123.9(2)  |
| 22     | C8    | C13   | 1.408(4)  | 24    | C4   | C5  | H5A  | 119.5     |
| 23     | C9    | H9A   | 0.93      | 25    | C4   | C5  | C6   | 121.0(2)  |
| 24     | C9    | C10   | 1.370(4)  | 26    | H5A  | C5  | C6   | 119.5     |
| 25     | C10   | H10A  | 0.93      | 27    | C1   | C6  | C5   | 121.7(2)  |
| 26     | C10   | C11   | 1.366(4)  | 28    | C1   | C6  | N1   | 113.5(2)  |
| 27     | C11   | H11A  | 0.93      | 29    | C5   | C6  | N1   | 124.8(2)  |
| 28     | C11   | C12   | 1.375(3)  | 30    | Zn1  | N1  | C6   | 109.5(1)  |
| 29     | C12   | H12A  | 0.93      | 31    | Zn1  | N1  | C7   | 126.8(2)  |
| 30     | C12   | C13   | 1.383(4)  | 32    | C6   | N1  | C7   | 123.6(2)  |
| 31     | C13   | N2    | 1.418(3)  | 33    | N1   | C7  | H7A  | 117       |
| 32     | N2    | C14   | 1.266(3)  | 34    | N1   | C7  | C8   | 125.9(2)  |
| 33     | C14   | H14A  | 0.929     | 35    | H7A  | C7  | C8   | 117.1     |
| 34     | C14   | C15   | 1.465(3)  | 36    | C7   | C8  | C9   | 116.7(2)  |
| 35     | C15   | C16   | 1.379(3)  | 37    | C7   | C8  | C13  | 126.1(2)  |
| 36     | C15   | N3    | 1.344(3)  | 38    | C9   | C8  | C13  | 117.2(2)  |
| 37     | C16   | H16A  | 0.93      | 39    | C8   | C9  | H9A  | 119       |
| 38     | C16   | C17   | 1.373(3)  | 40    | C8   | C9  | C10  | 122.0(2)  |
| 39     | C17   | H17A  | 0.931     | 41    | H9A  | C9  | C10  | 119       |
| 40     | C17   | C18   | 1.364(4)  | 42    | C9   | C10 | H10A | 120.1     |
| 41     | C18   | H18A  | 0.929     | 43    | C9   | C10 | C11  | 119.8(2)  |
| 42     | C18   | C19   | 1.379(4)  | 44    | H10A | C10 | C11  | 120.2     |
| 43     | C19   | H19A  | 0.93      | 45    | C10  | C11 | H11A | 119.8     |
| 44     | C19   | N3    | 1.330(3)  | 46    | C10  | C11 | C12  | 120.4(2)  |
| 45     | C20   | C21   | 1.525(4)  | 47    | H11A | C11 | C12  | 119.9     |
| 46     | C20   | C22   | 1.528(3)  | 48    | C11  | C12 | H12A | 119.8     |
| 47     | C20   | C23   | 1.528(4)  | 49    | C11  | C12 | C13  | 120.5(2)  |
|        |       |       |           | 50    | H12A | C12 | C13  | 119.7     |
|        |       |       |           | 51    | C8   | C13 | C12  | 120.1(2)  |
|        |       |       |           | 52    | C8   | C13 | N2   | 119.0(2)  |
|        |       |       |           | 53    | C12  | C13 | N2   | 120.9(2)  |
|        |       |       |           | 54    | Zn1  | N2  | C13  | 123.4(1)  |
|        |       |       |           | 55    | Zn1  | N2  | C14  | 114.6(2)  |
|        |       |       |           | 56    | C13  | N2  | C14  | 122.1(2)  |
|        |       |       |           | 57    | N2   | C14 | H14A | 120.4     |
|        |       |       |           | 58    | N2   | C14 | C15  | 119.2(2)  |
|        |       |       |           | 59    | H14A | C14 | C15  | 120.4     |
|        |       |       |           | 60    | C14  | C15 | C16  | 123.2(2)  |
|        |       |       |           | 61    | C14  | C15 | N3   | 114.7(2)  |
|        |       |       |           | 62    | C16  | C15 | N3   | 122.1(2)  |
|        |       |       |           | 63    | C15  | C16 | H16A | 120.8     |
|        |       |       |           | 64    | C15  | C16 | C17  | 118.4(2)  |
|        |       |       |           | 65    | H16A | C16 | C17  | 120.8     |
|        |       |       |           | 66    | C16  | C17 | H17A | 120       |
|        |       |       |           | 67    | C16  | C17 | C18  | 119.9(2)  |
|        |       |       |           | 68    | H17A | C17 | C18  | 120       |
|        |       |       |           | 69    | C17  | C18 | H18A | 120.8     |
|        |       |       |           | 70    | C17  | C18 | C19  | 118.5(2)  |
|        |       |       |           | 71    | H18A | C18 | C19  | 120.7     |

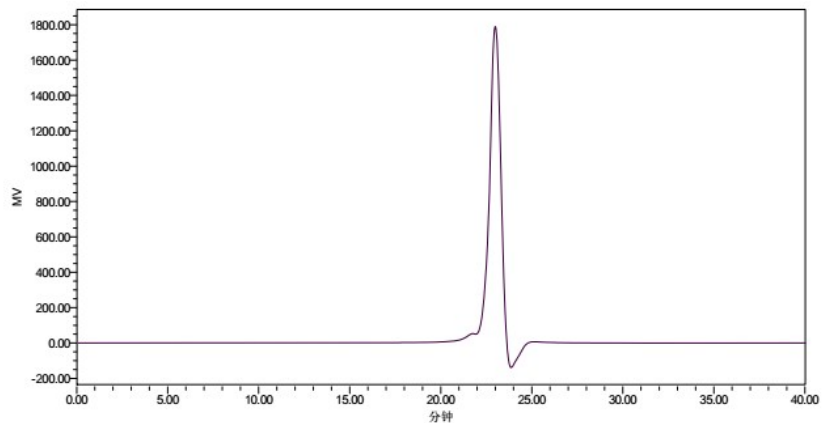

**Figure S2.** GPC analysis of Styrene Carbonate reaction mixture relevant to table 4 entry 12 showing no polymer chain

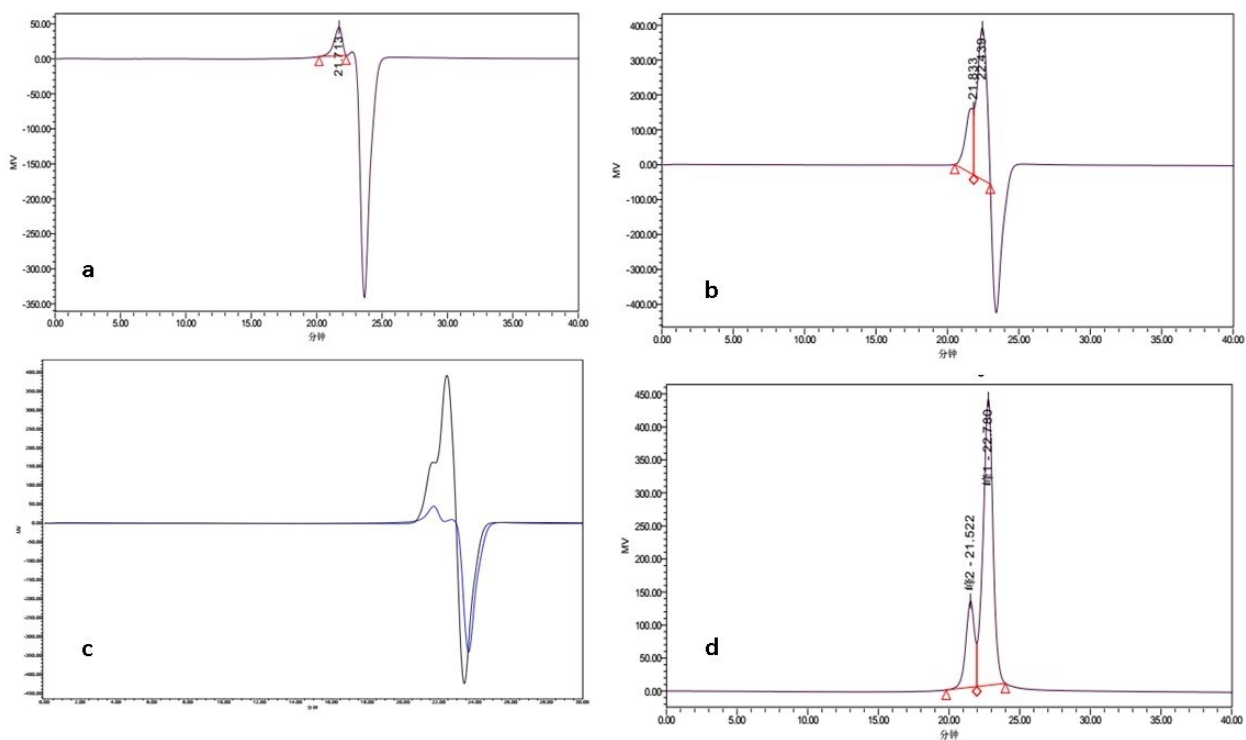

**Figure S3.** GPC analysis of **a)** typical polyether of cyclohexane oxide identified by  $^1\text{H}$  NMR, **b)** Cyclohexane carbonate reaction mixture (Table 5, entries 6-10), **c)** Overlap spectra of **(a)** (blue) and **(b)** (black), **d)** Cyclohexane carbonate reaction catalyzed by TBAI relevant to table 5, entry 11.



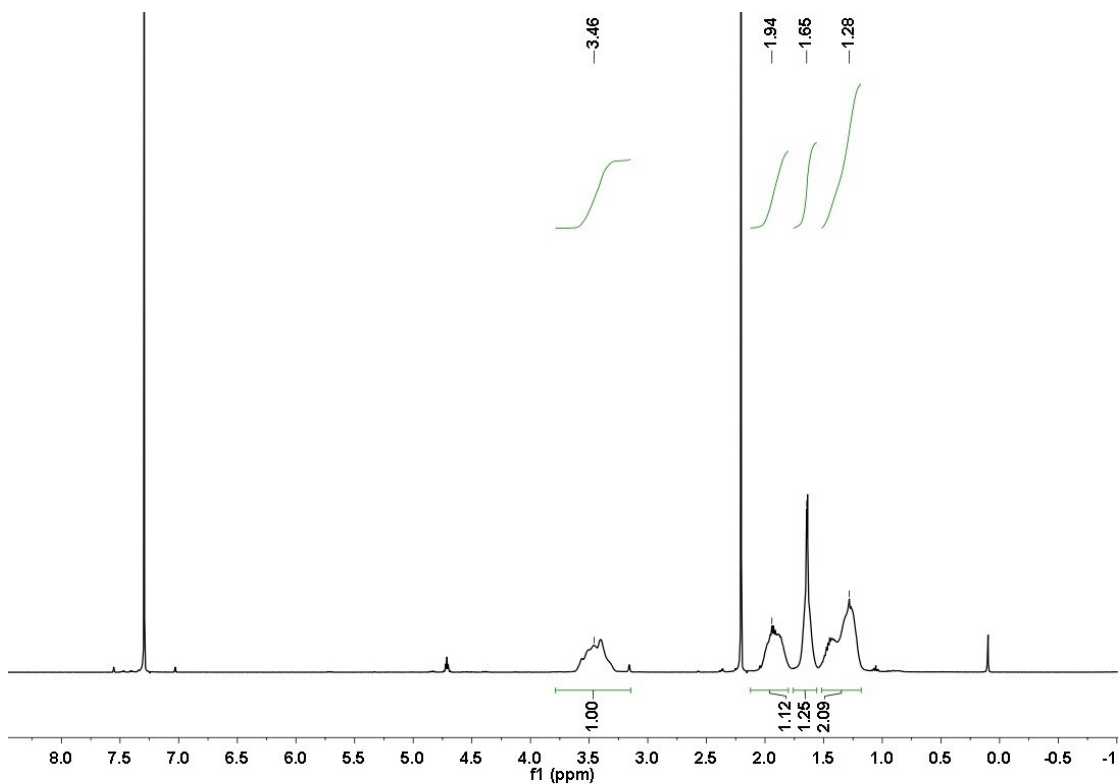

**Figure S4.**  $^1\text{H}$  NMR spectrum of the cyclohexane oxide polyether chain (broad signal at  $\delta = 3.45$  ppm)  
(It was isolated by crystallization in THF in  $-1$  °C)

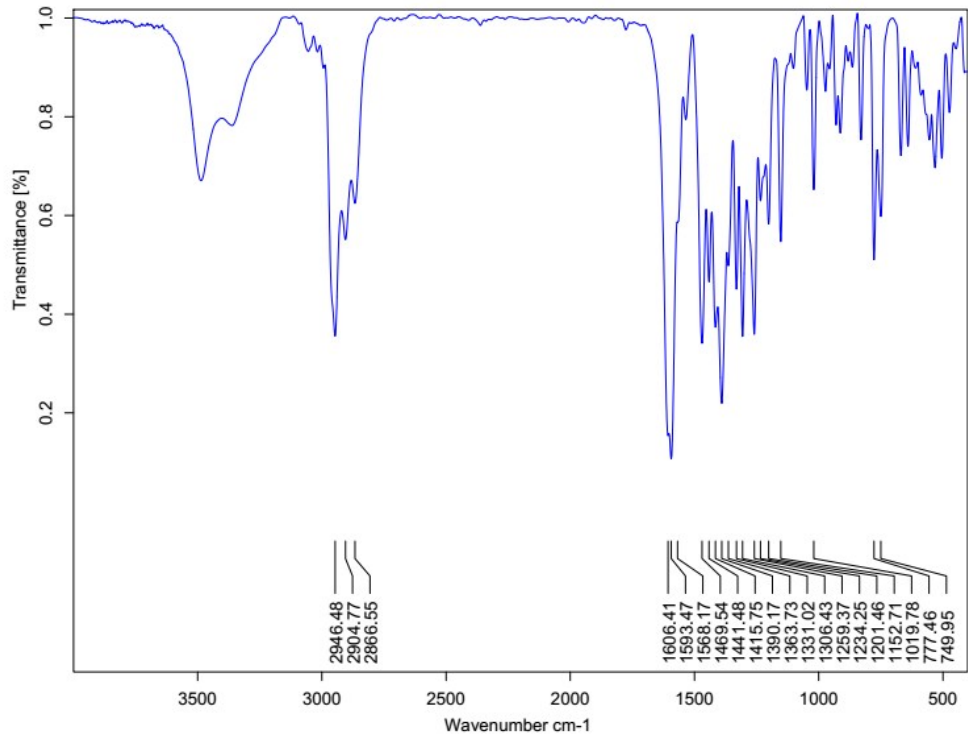

Figure S5. FT-IR of ZnL<sup>APIPOAc</sup>

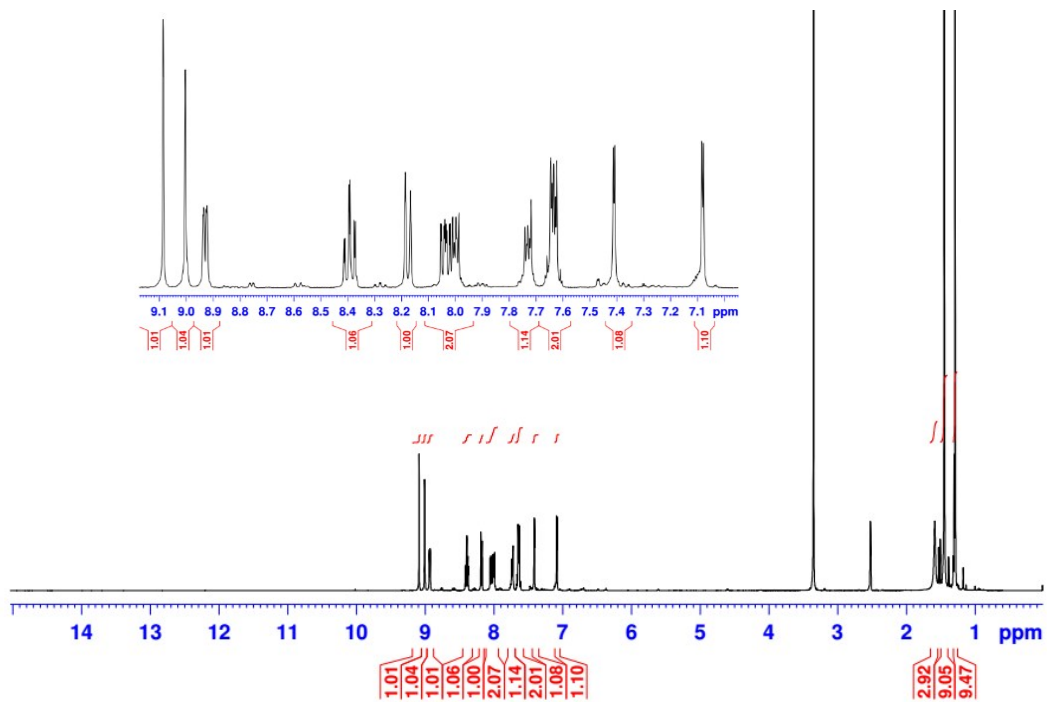

Figure S6. <sup>1</sup>H NMR of ZnL<sup>APIPOAc</sup>

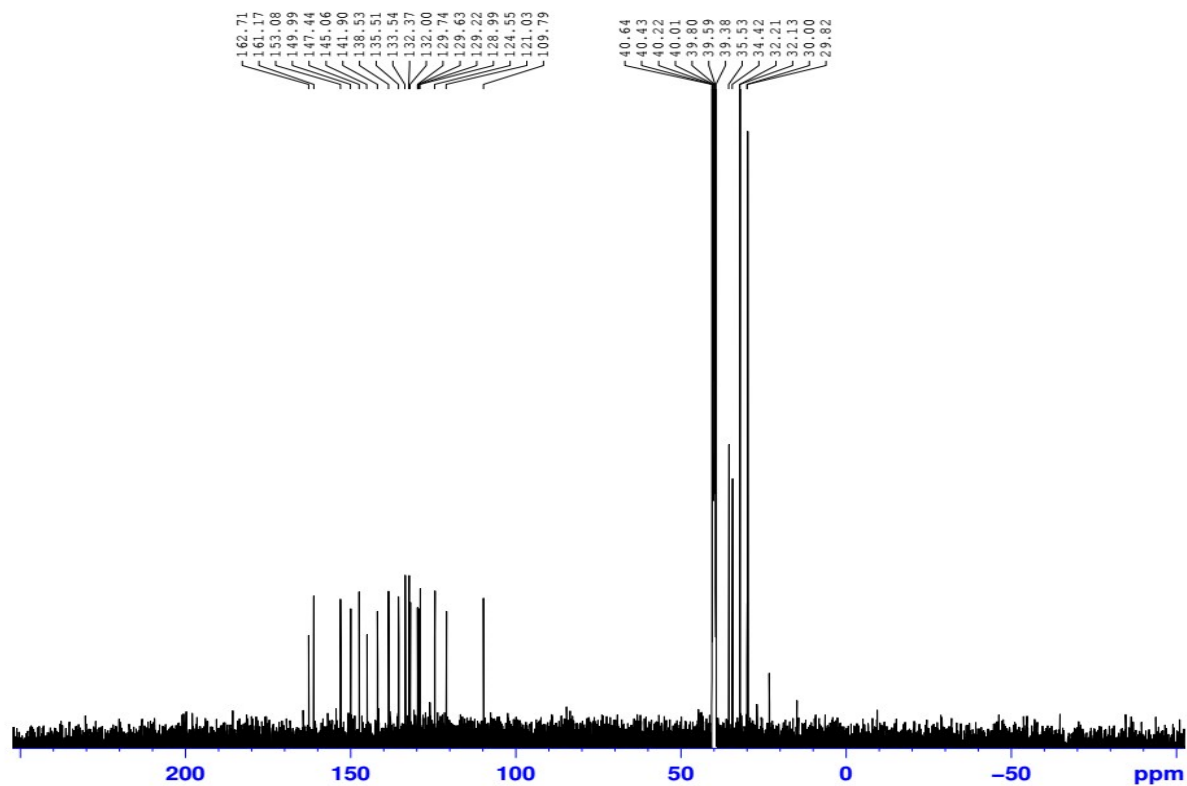

Figure S7.  $^{13}\text{C}$  NMR of  $\text{ZnL}^{\text{APIPOAc}}$

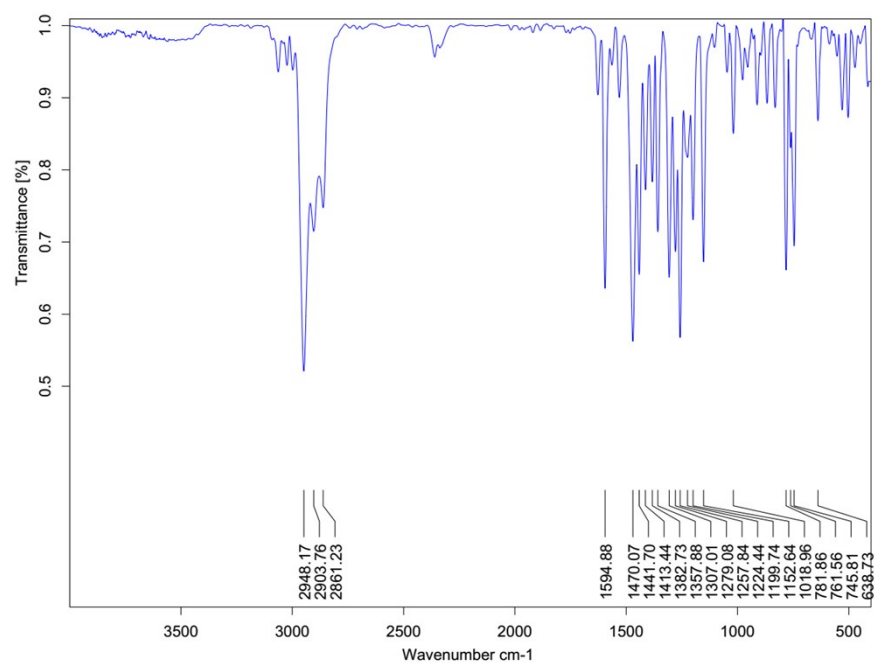

Figure S8. FTIR of  $\text{ZnL}^{\text{APIPCI}}$

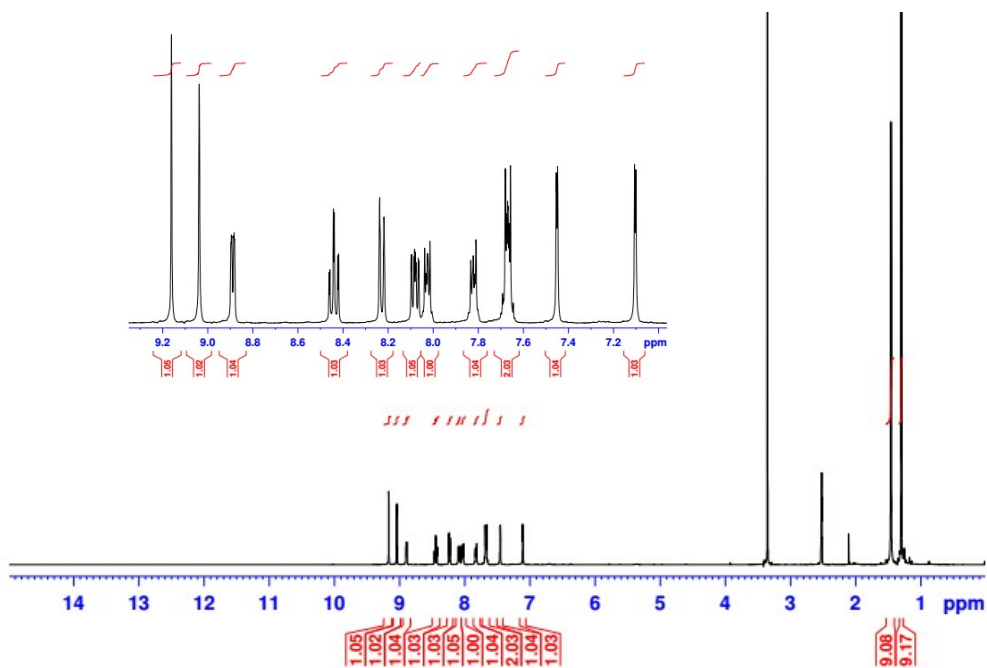

Figure S9.  $^1\text{H}$  NMR of  $\text{ZnL}^{\text{APIPCl}}$

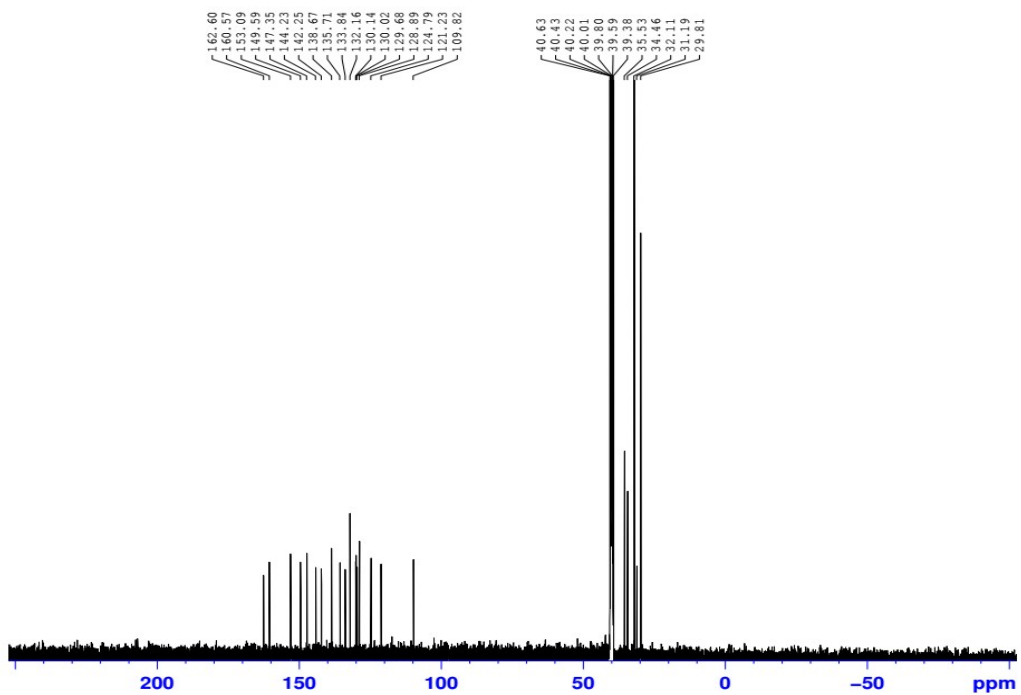

Figure S10.  $^{13}\text{C}$  NMR of  $\text{ZnL}^{\text{APIPCl}}$

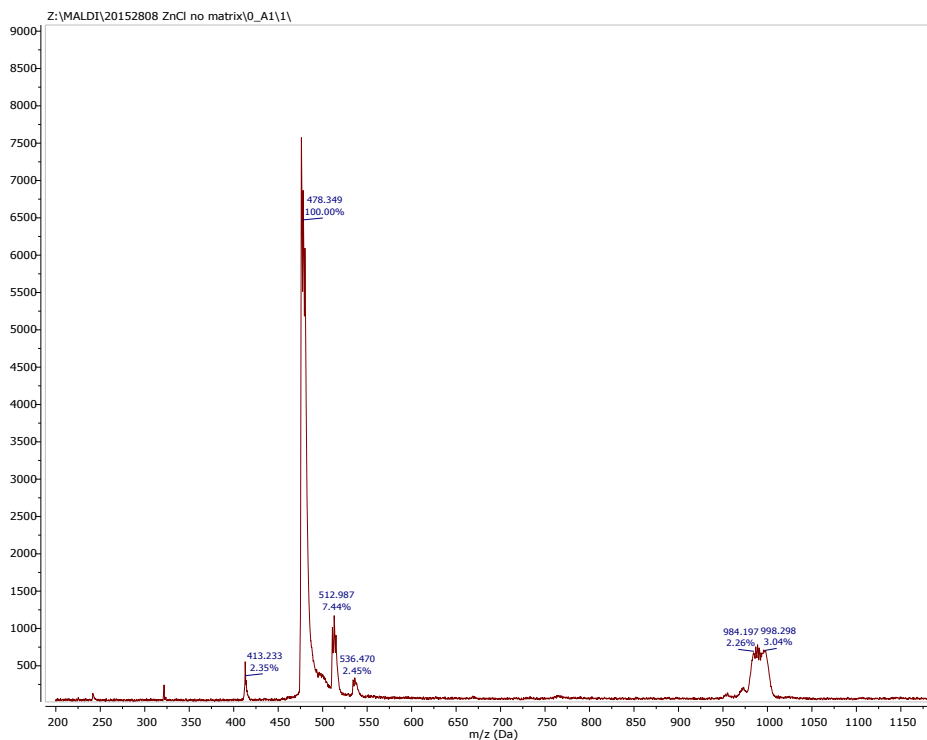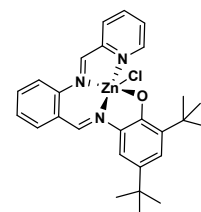

Molecular Weight: 513.39

Figure S11. MALDI-MS of ZnL<sup>API</sup>Cl

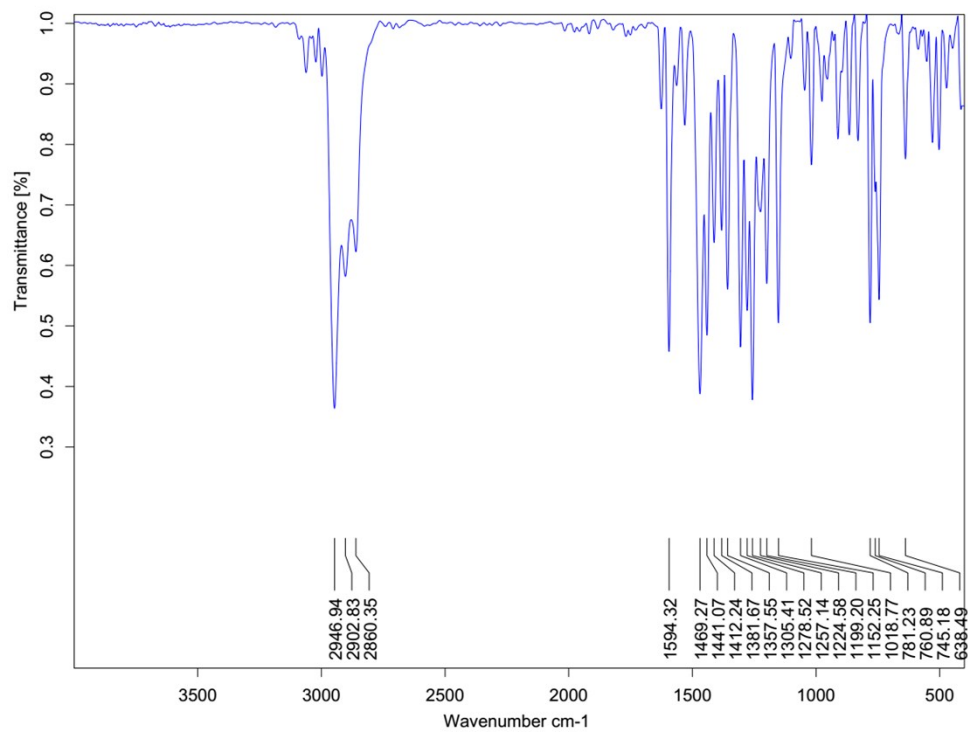

Figure S12. FTIR of ZnL<sup>API</sup>Br

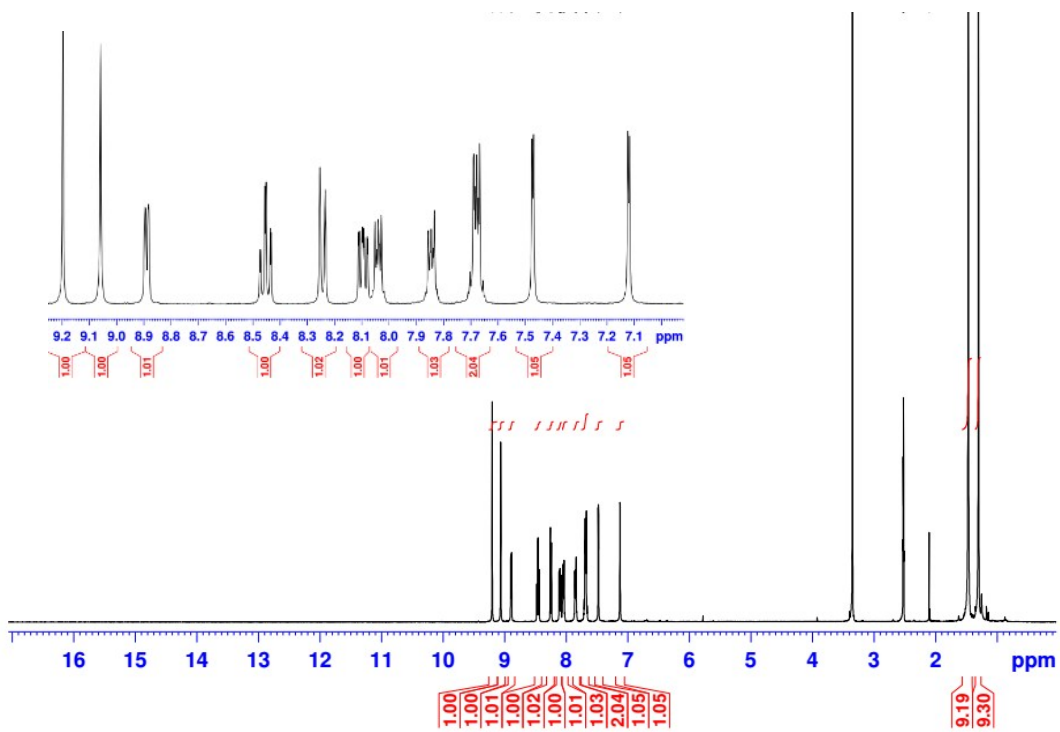

Figure S13.  $^1\text{H}$  NMR of  $\text{ZnL}^{\text{API}}\text{Br}$

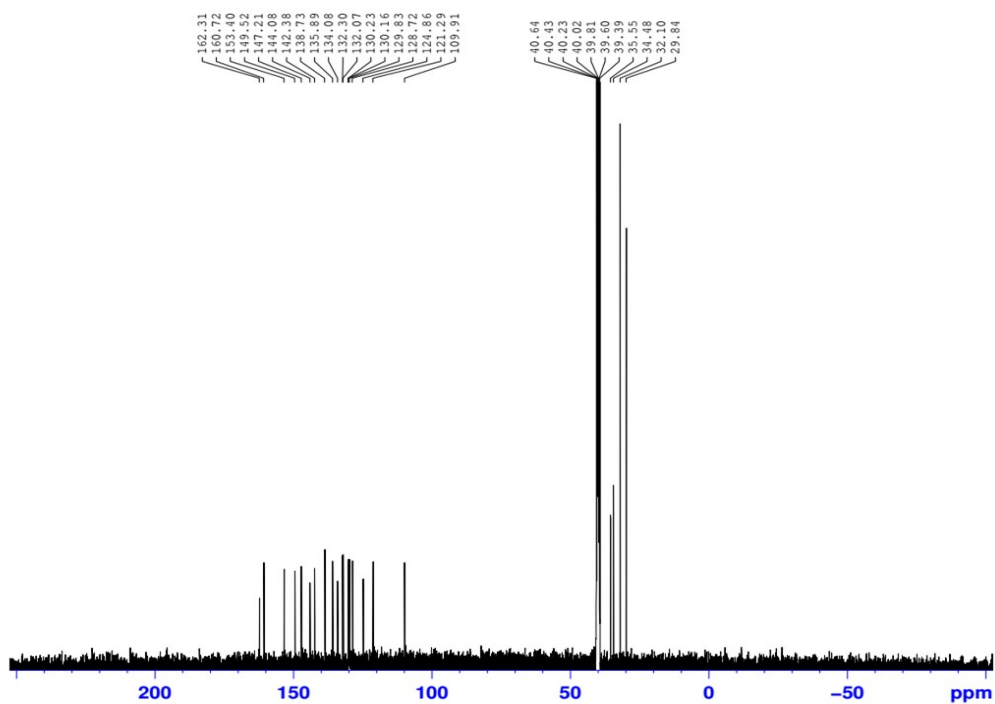

Figure S14.  $^{13}\text{C}$  NMR of  $\text{ZnL}^{\text{API}}\text{Br}$

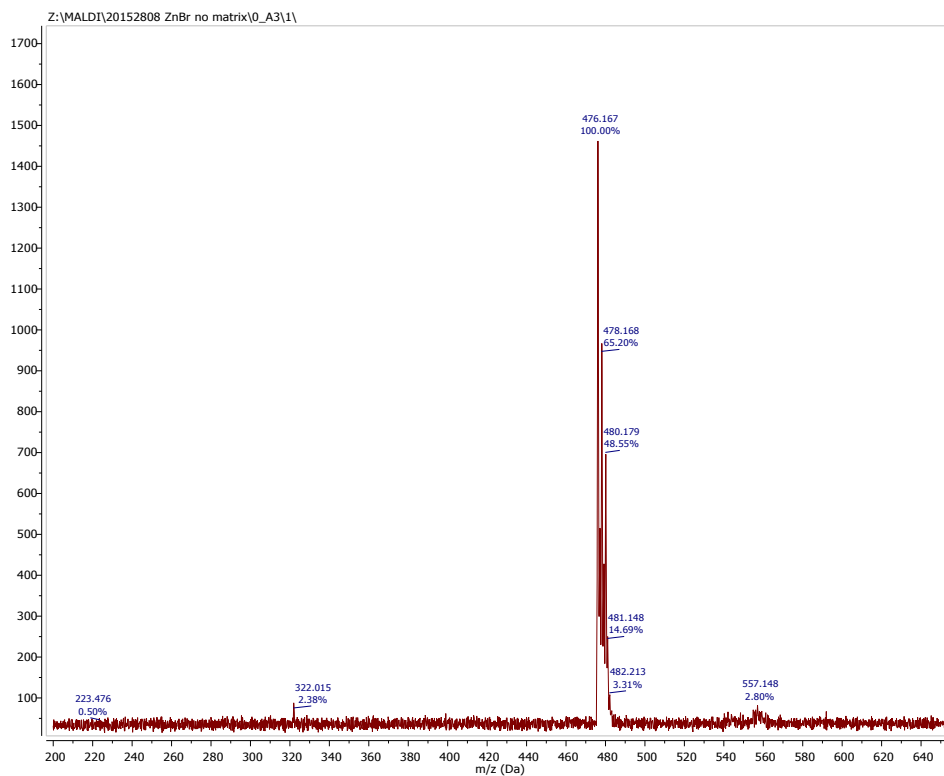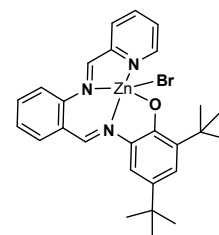

$C_{27}H_{30}BrN_3OZn$   
Exact Mass: 555.09

Figure S15. MALDI-MS of  $ZnL^{API}Br$

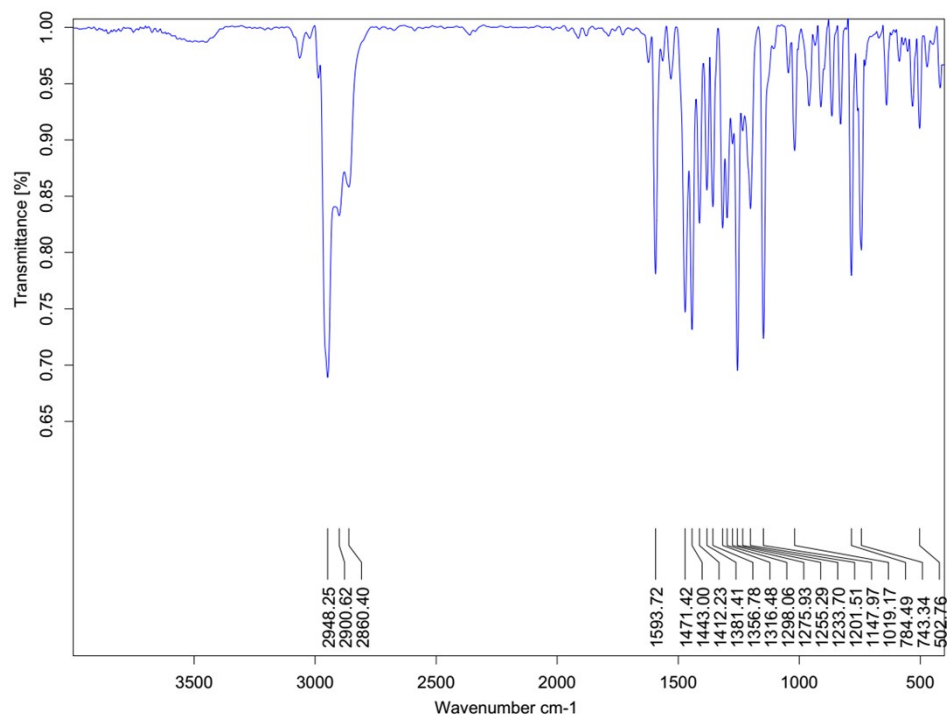

Figure S16. FTIR of  $ZnL^{API}$

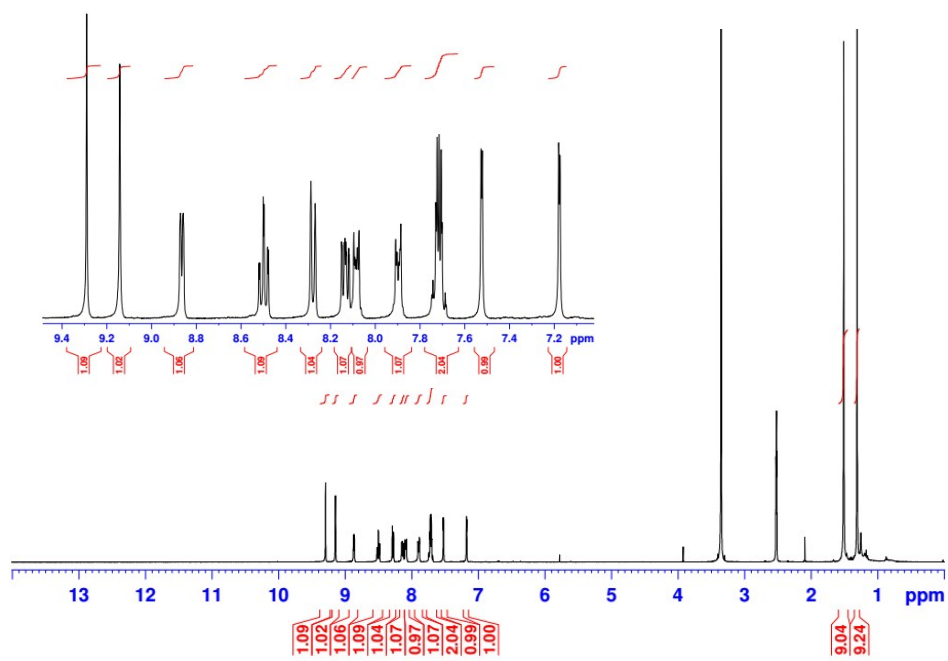

Figure S17.  $^1\text{H}$  NMR of  $\text{ZnL}^{\text{APIP I}}$

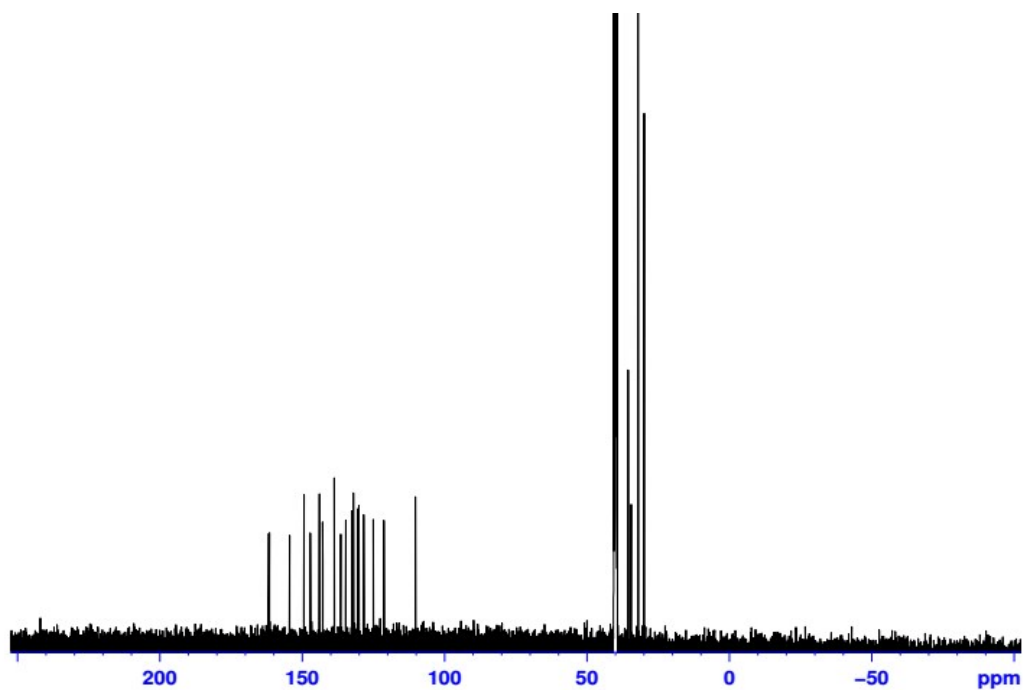

Figure S18.  $^{13}\text{C}$  NMR of  $\text{ZnL}^{\text{APIP I}}$



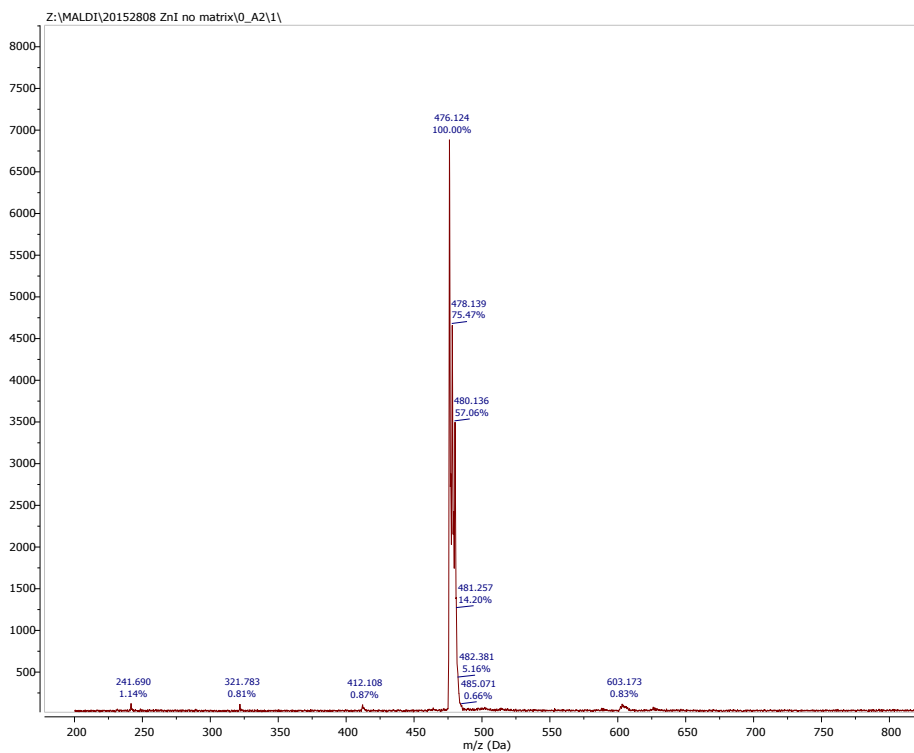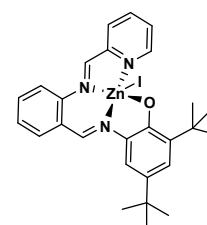

$C_{27}H_{30}IN_3OZn$   
Exact Mass: 603.07

Figure S19. MALDI-MS of ZnL<sup>APIP</sup> I

Additional IR,  $^1\text{H}$  and  $^{13}\text{C}$  NMR spectra of products

(1b) Styrene carbonate was isolated as a white powder. mp: 60 °C

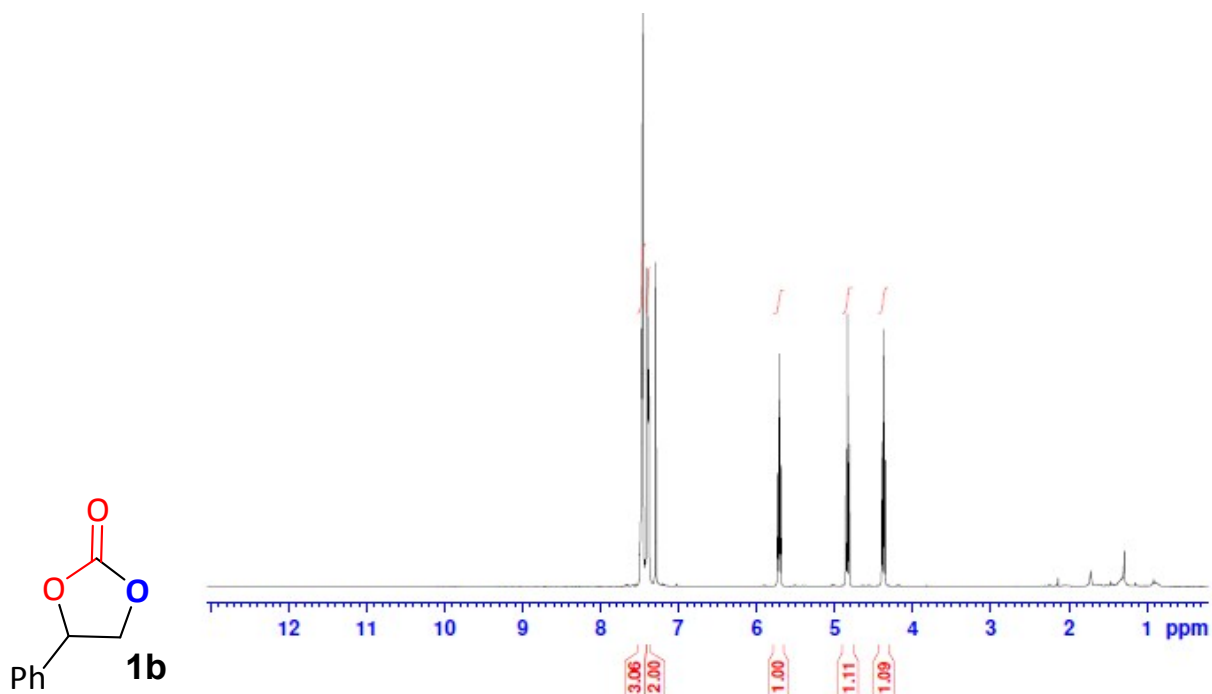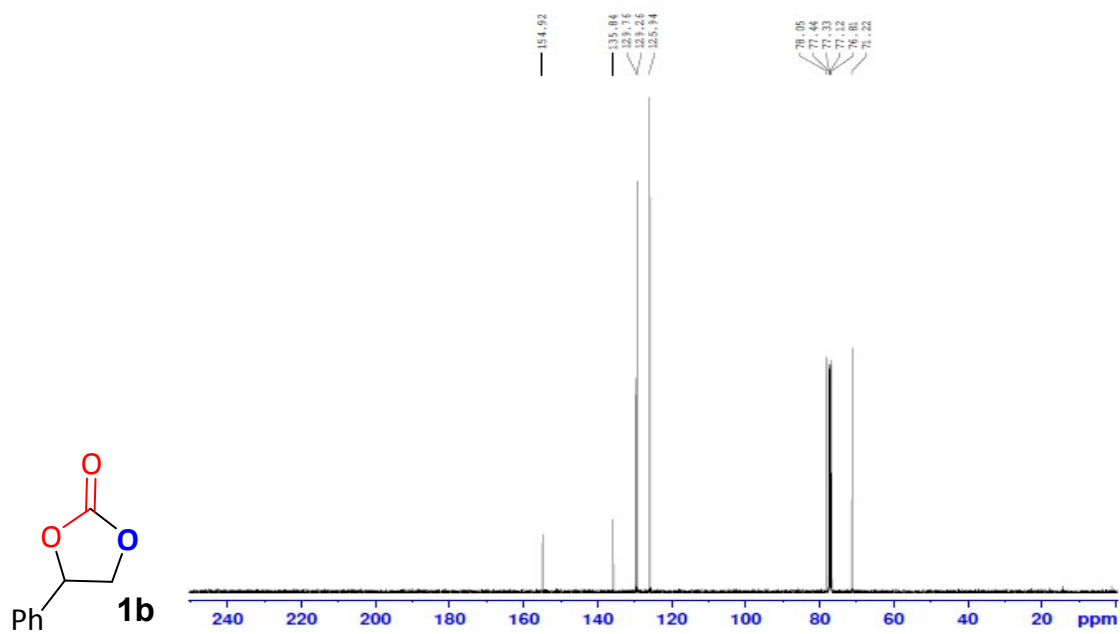

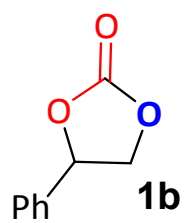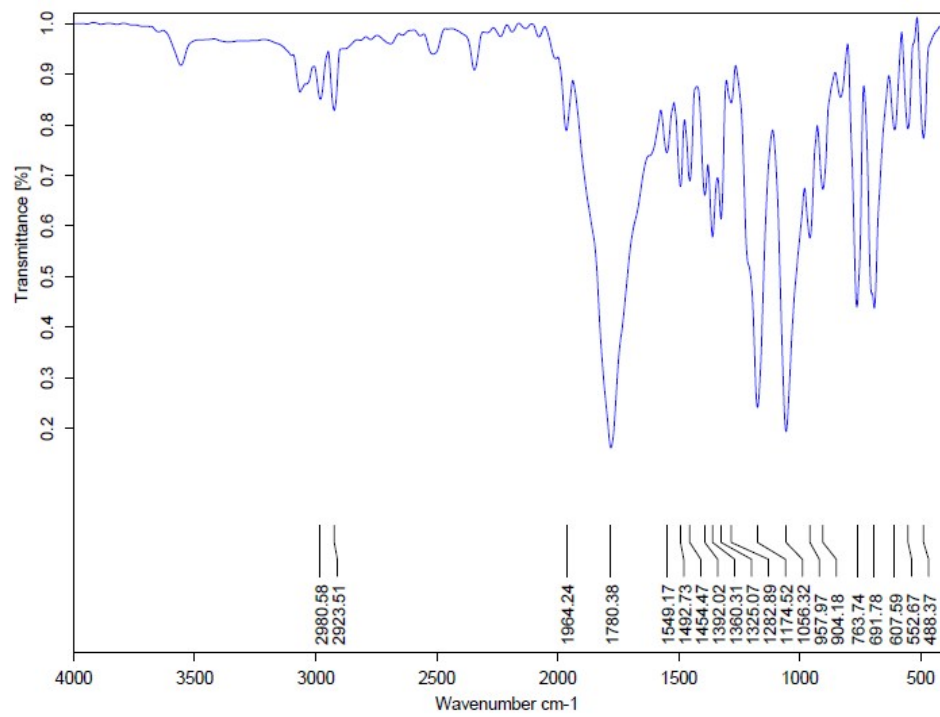

(2b) Propylene carbonate was isolated as colorless oil.

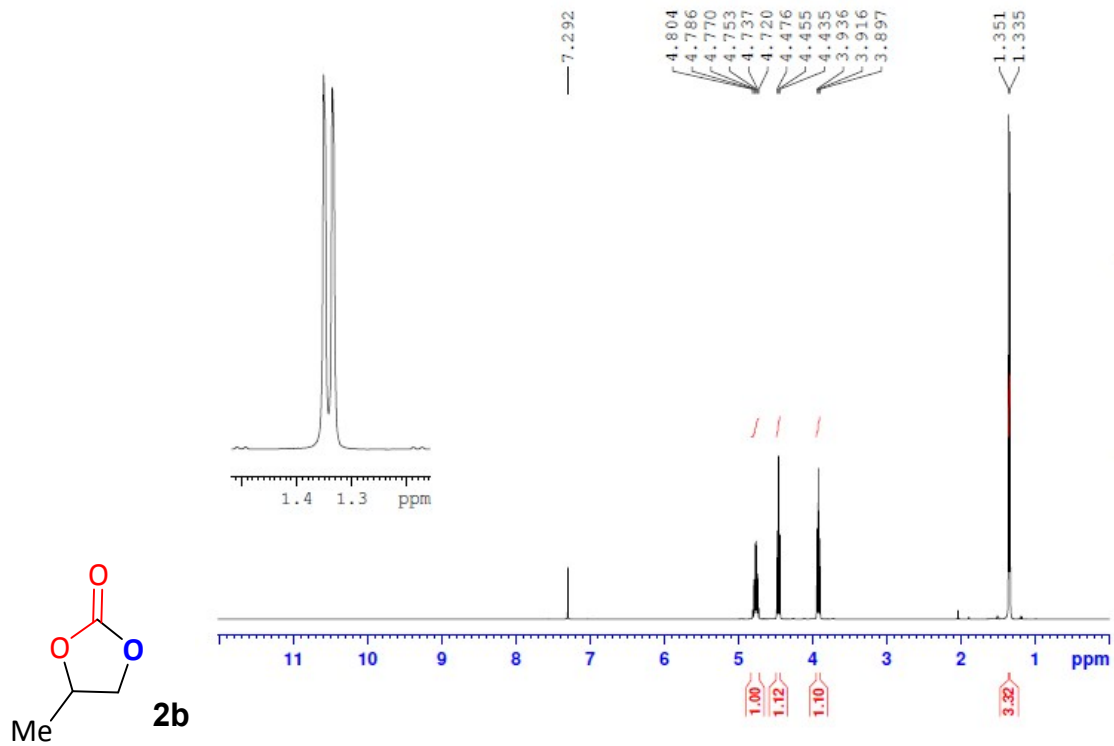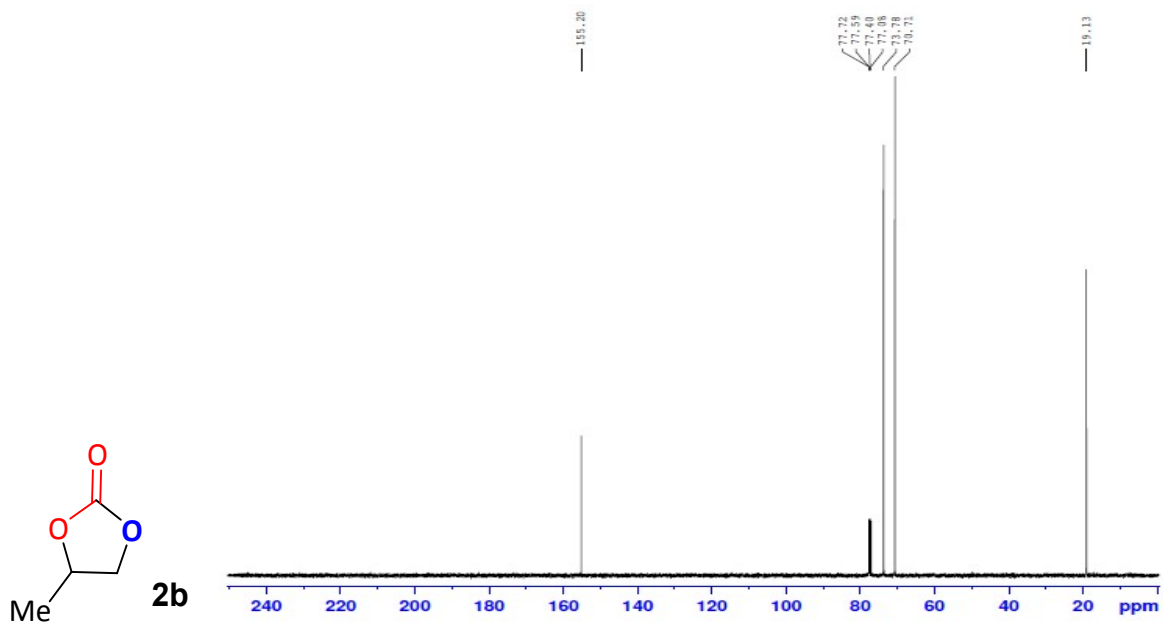

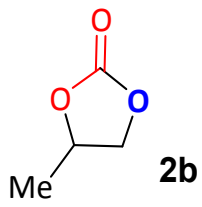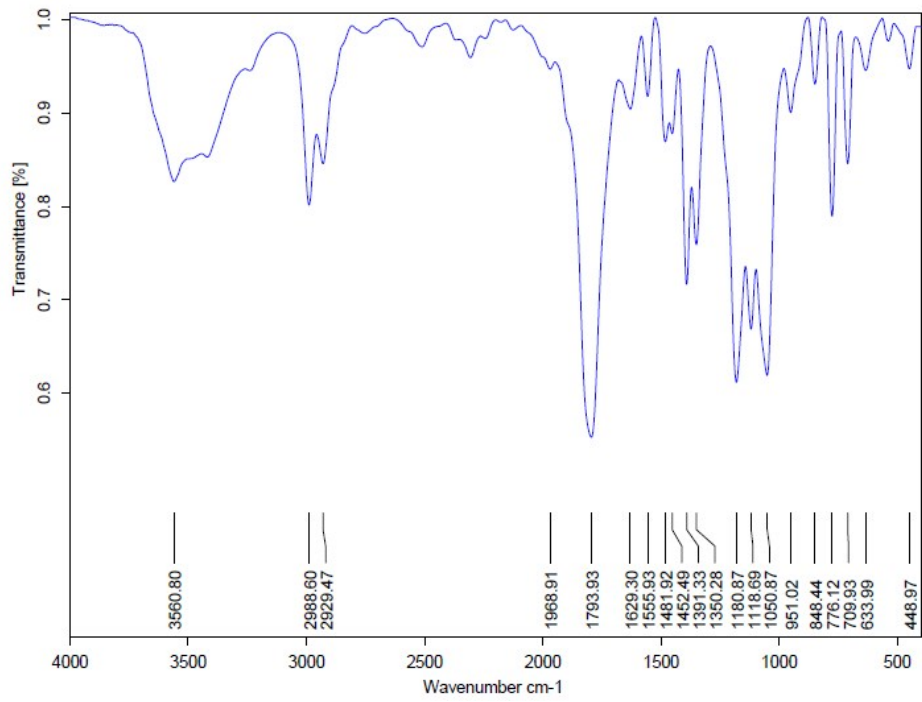

(3b) Ethylene Carbonate was isolated as white powder.

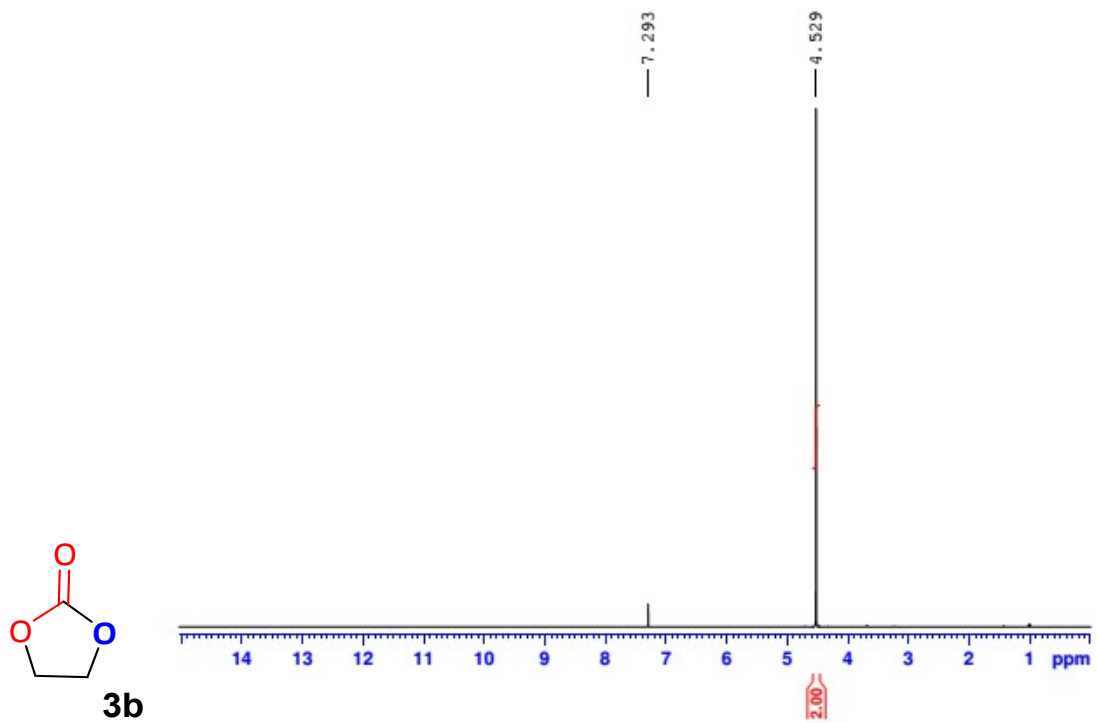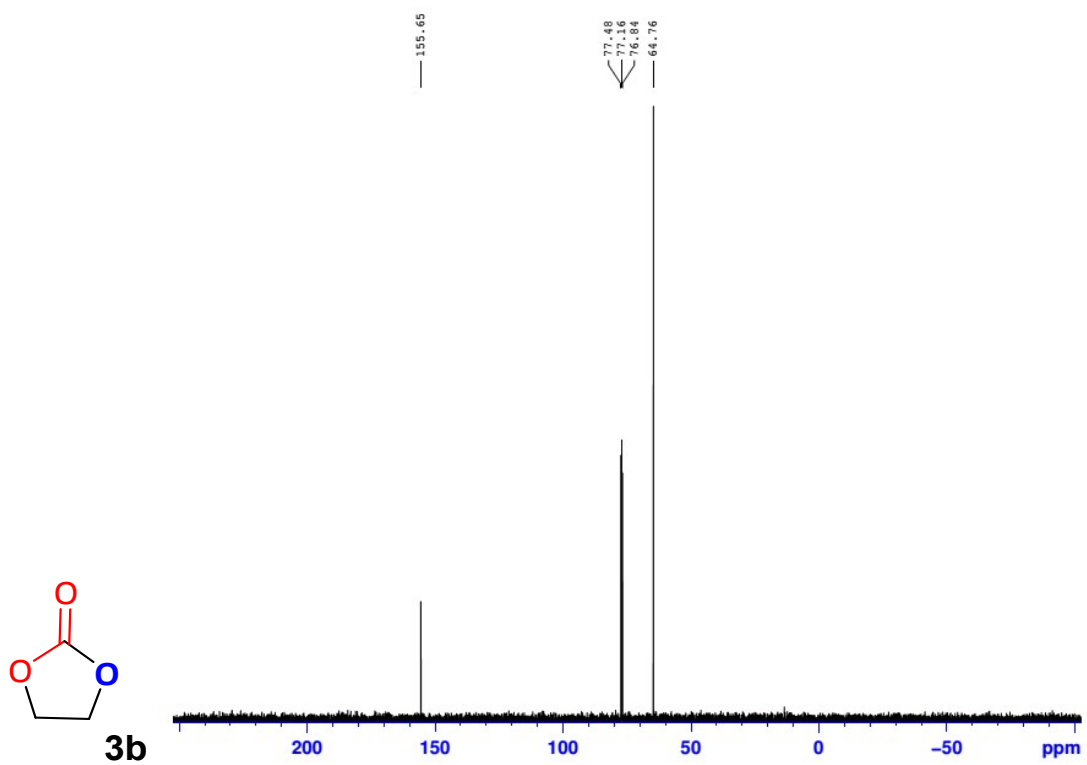

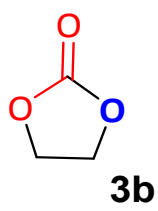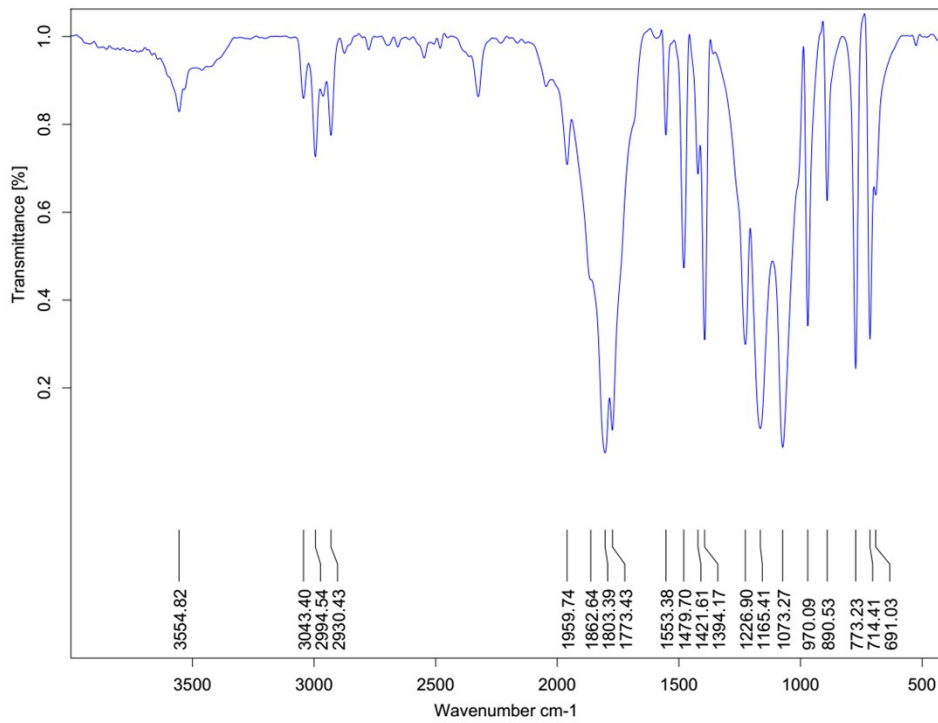

(4b) 4-((allyloxy)methyl)-1,3-dioxolan-2-one was isolated as pale yellow oil.

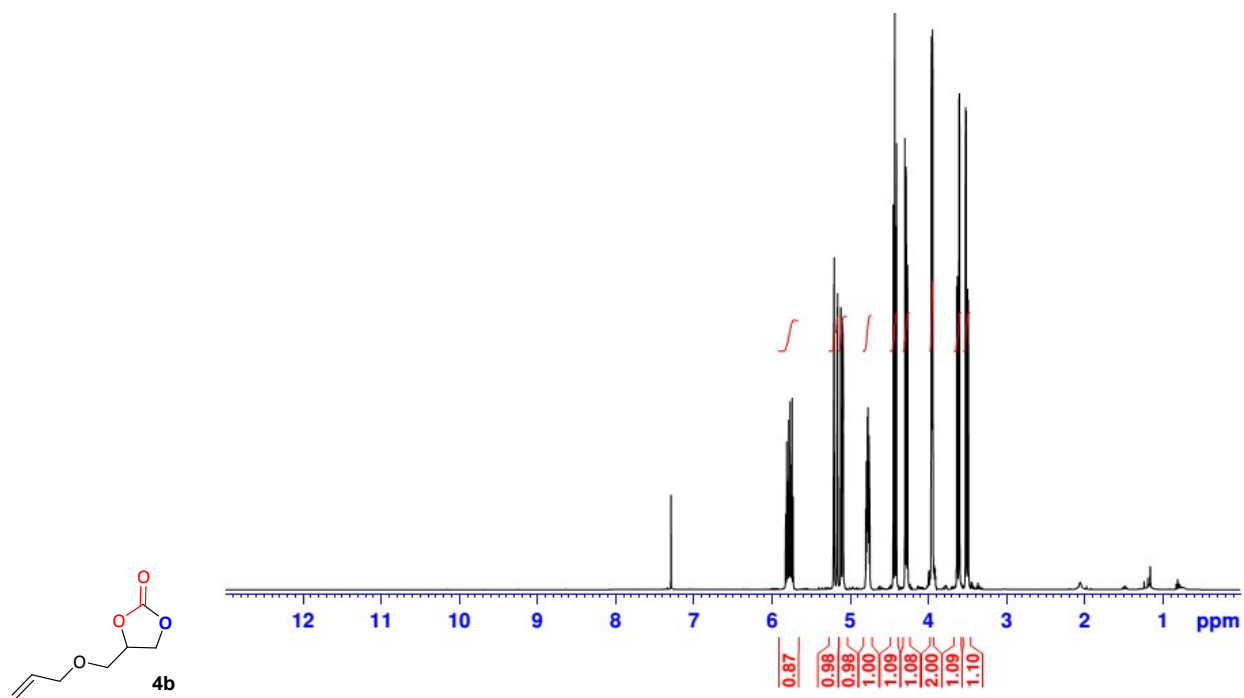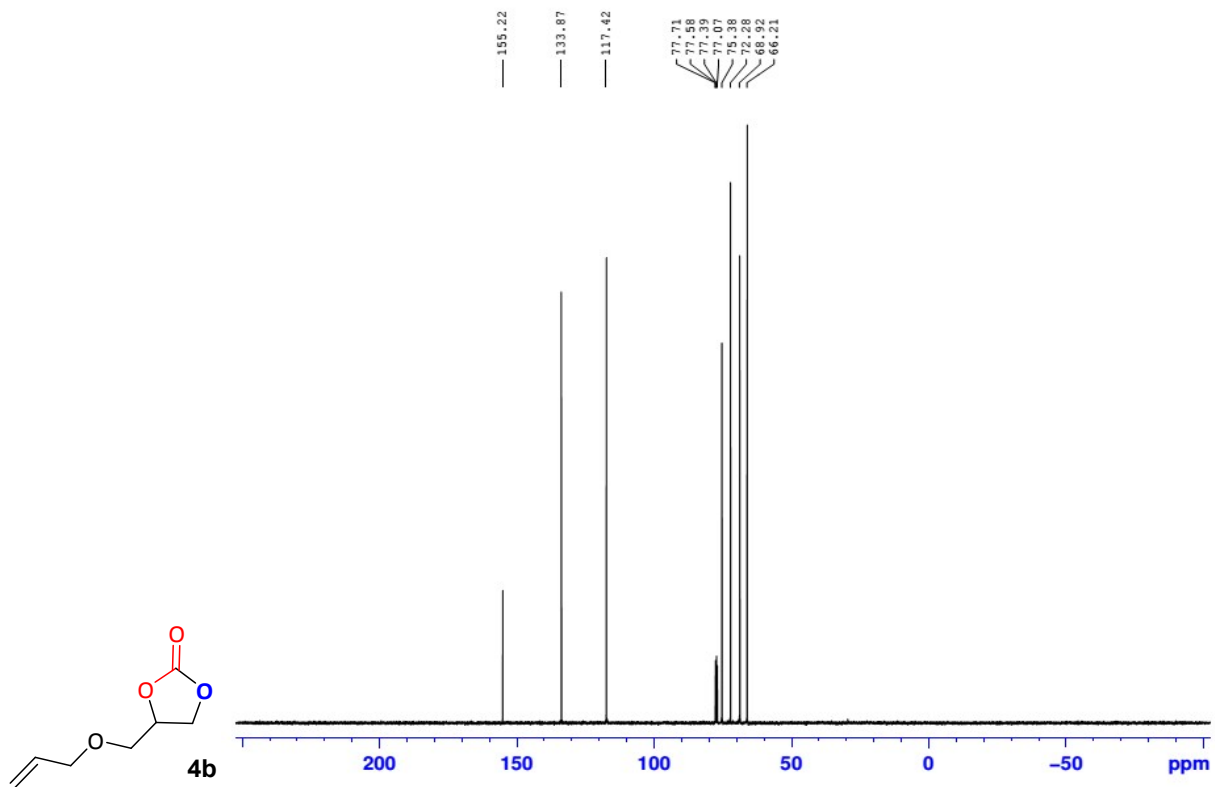



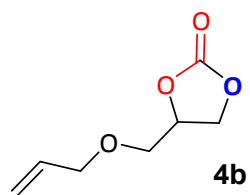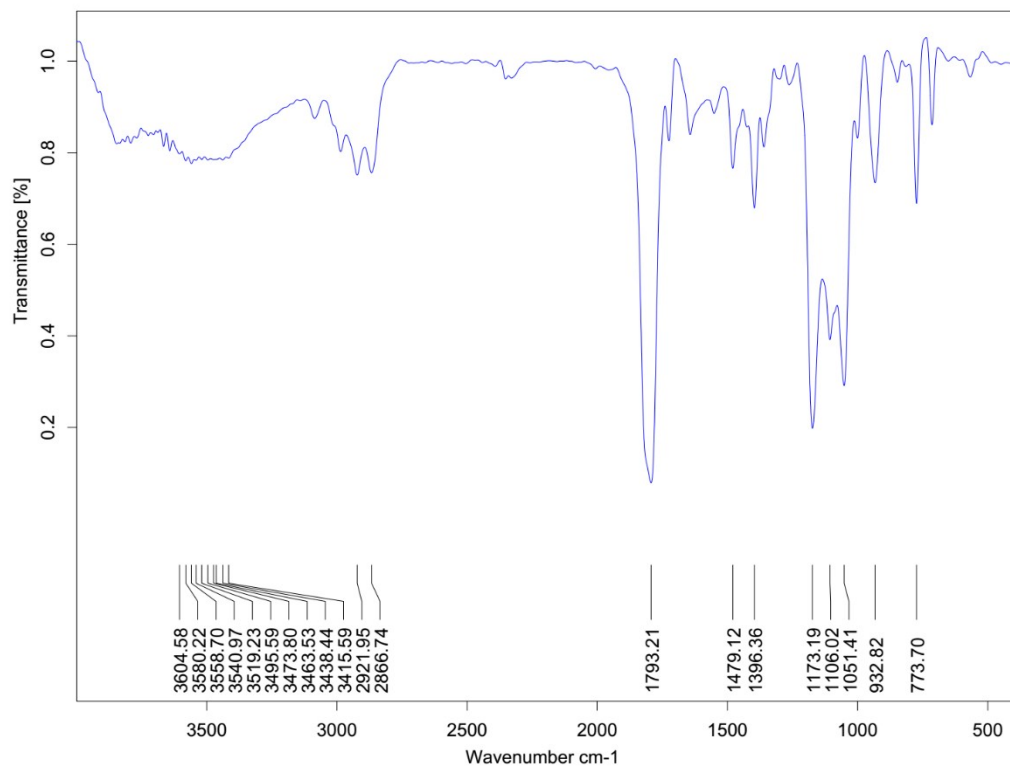

(5b) (2-oxo-1,3-dioxolan-4-yl)methyl methacrylate

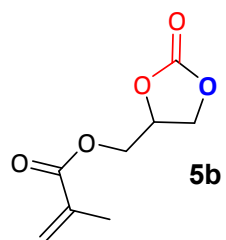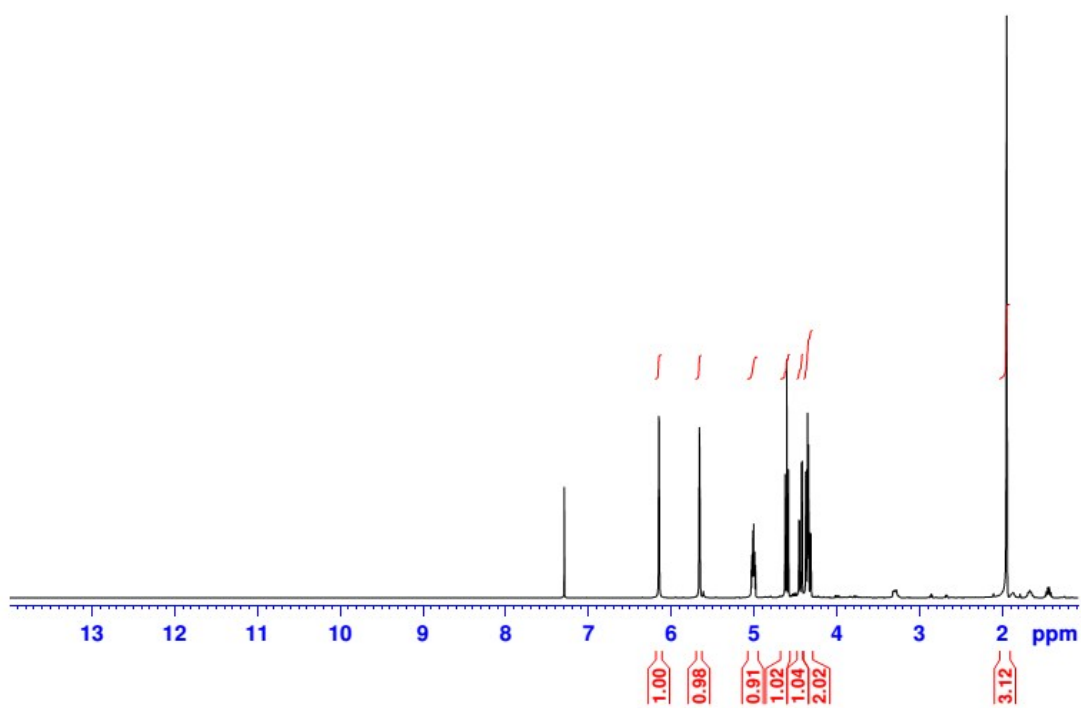

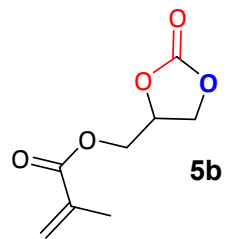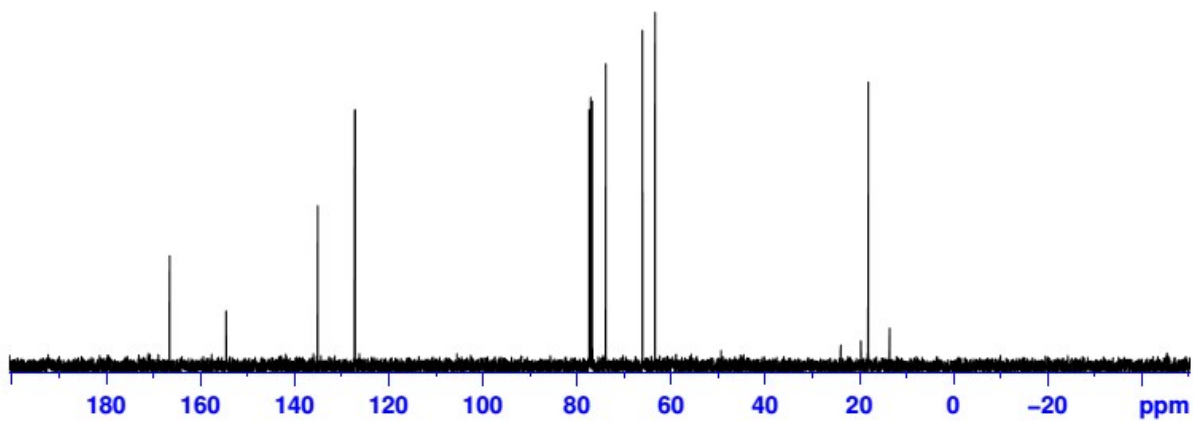

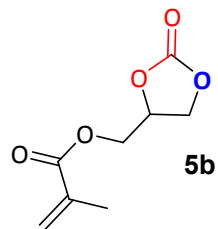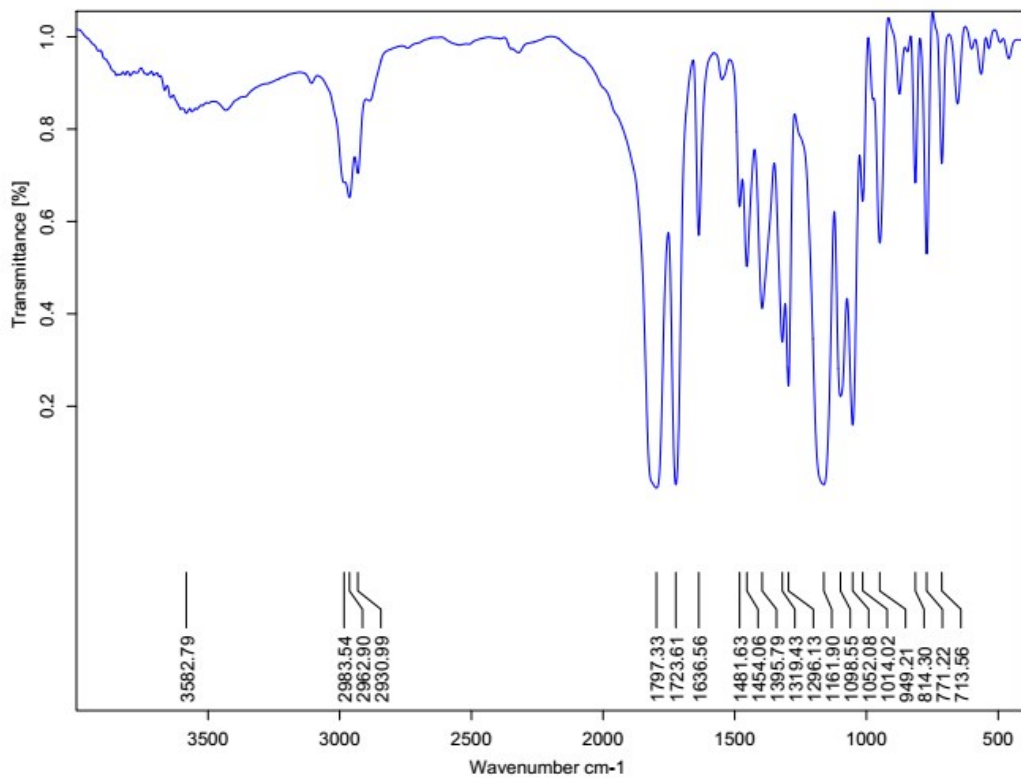

(6b) 4-(isopropoxymethyl)-1,3-dioxolan-2-one

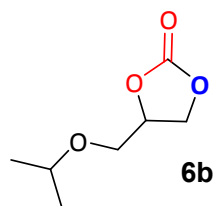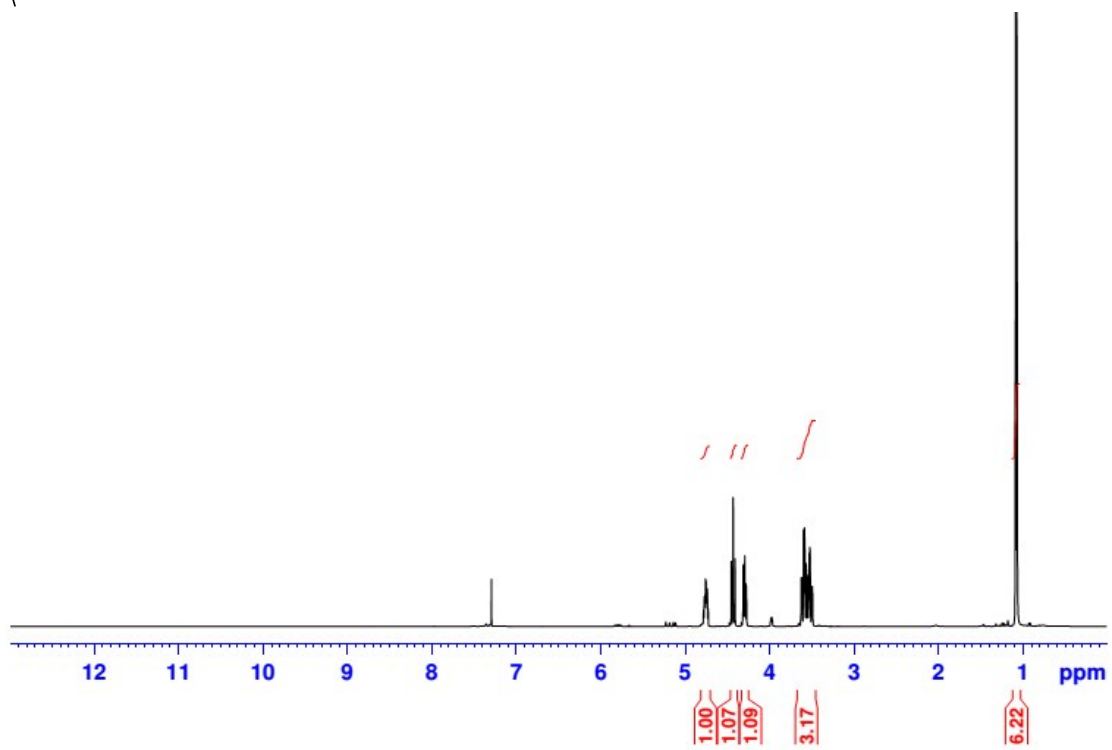

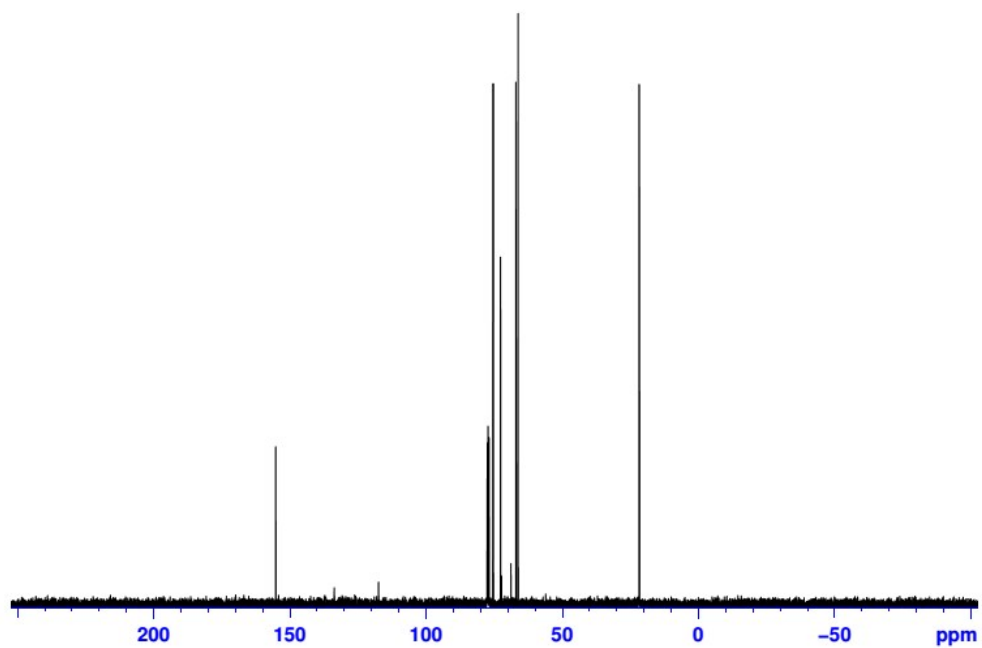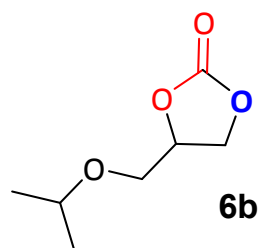

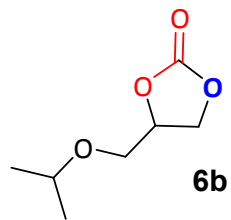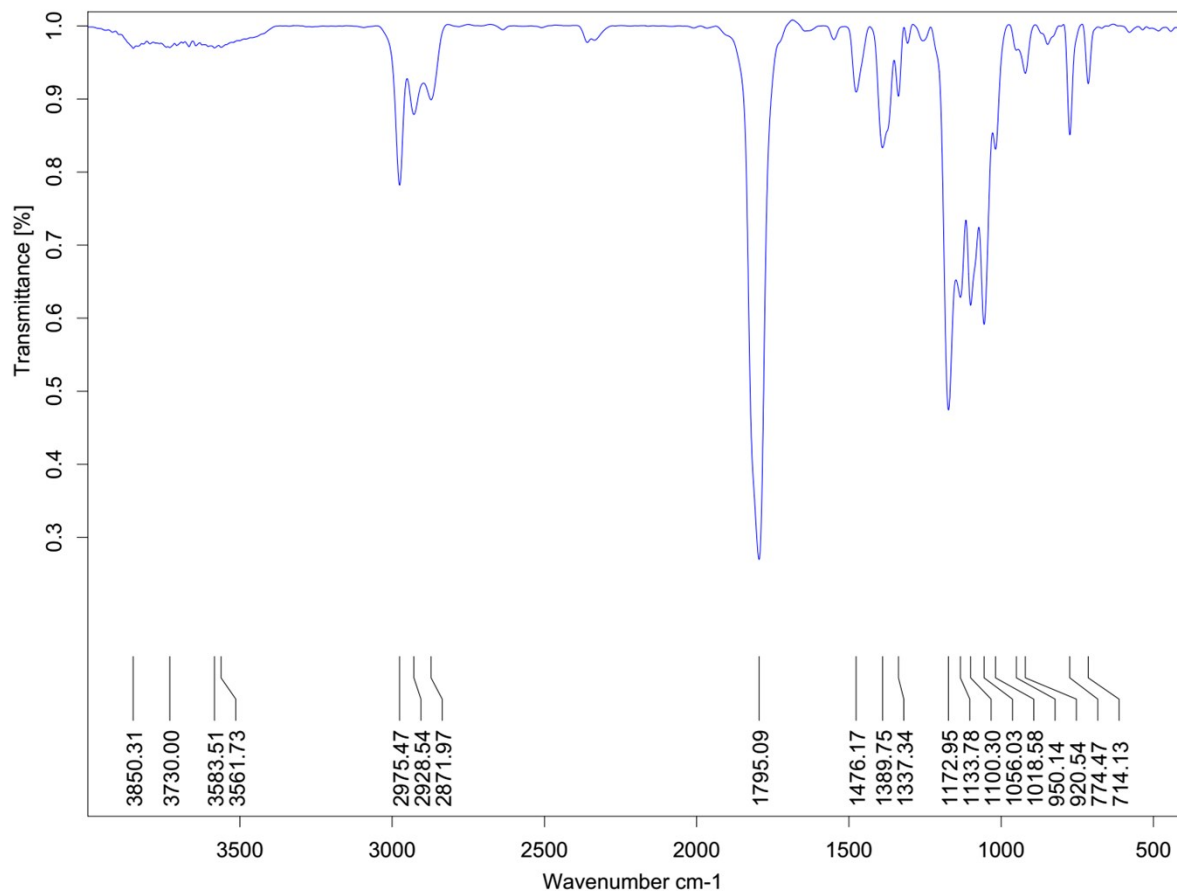

(7b) 4-(butoxymethyl)-1,3-dioxolan-2-one

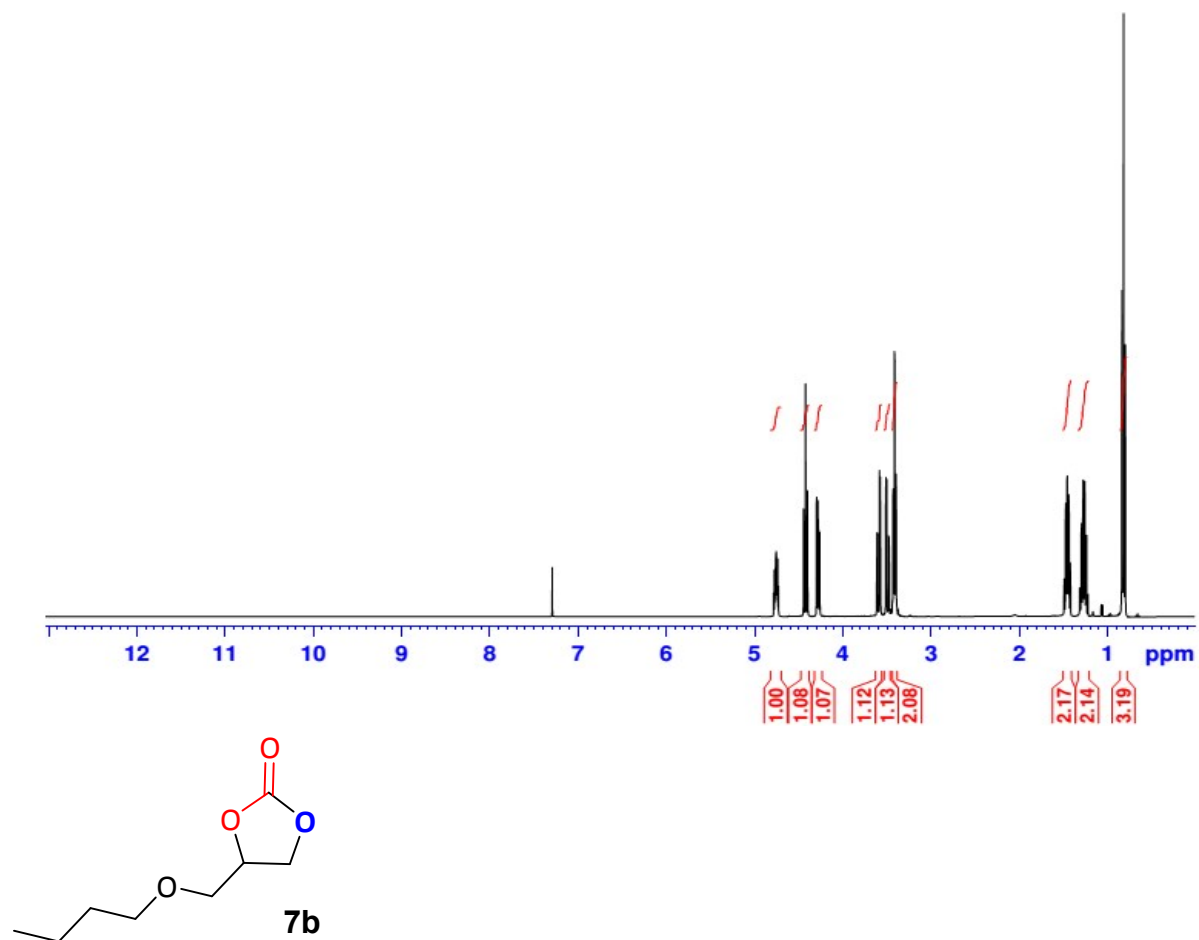



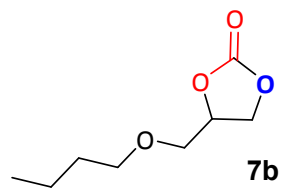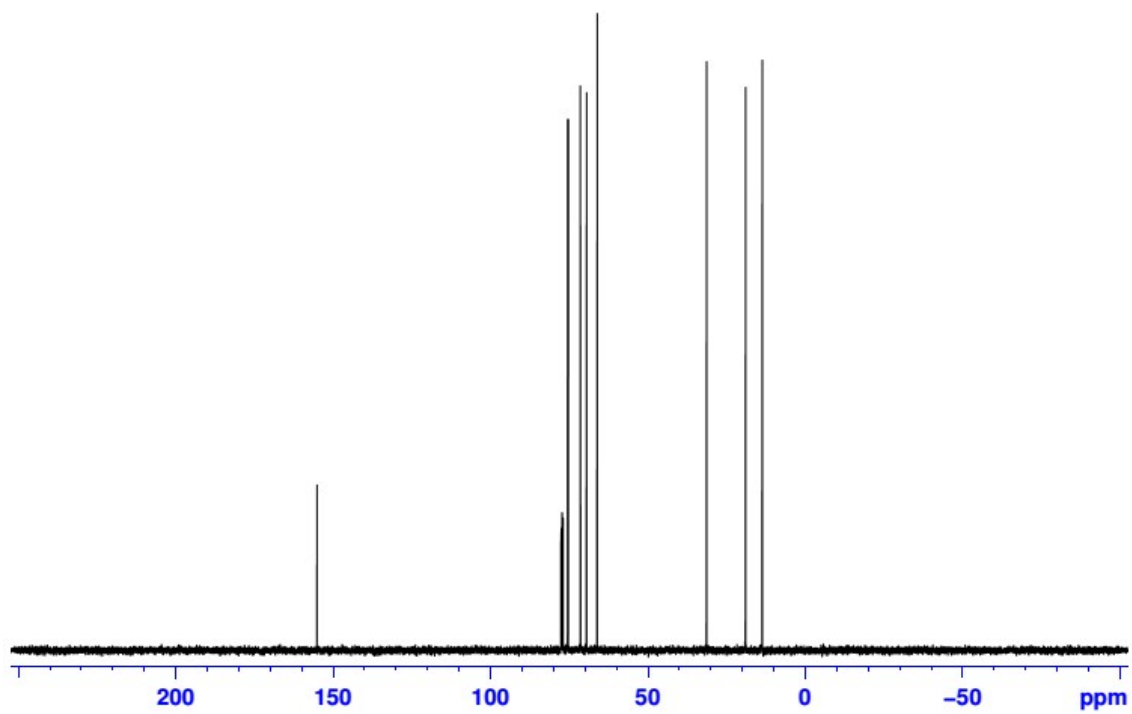

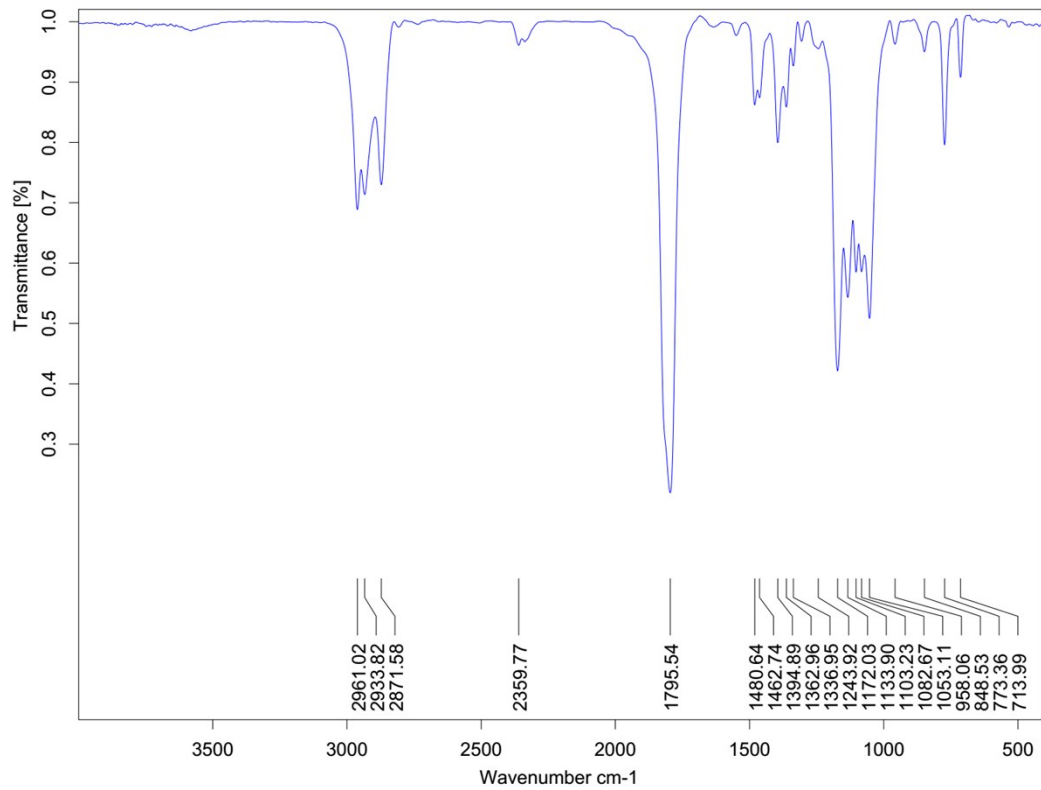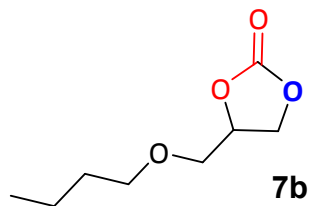

(8b) 4-(chloromethyl)-1,3-dioxolan-2-one

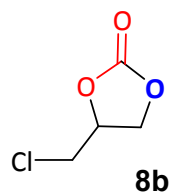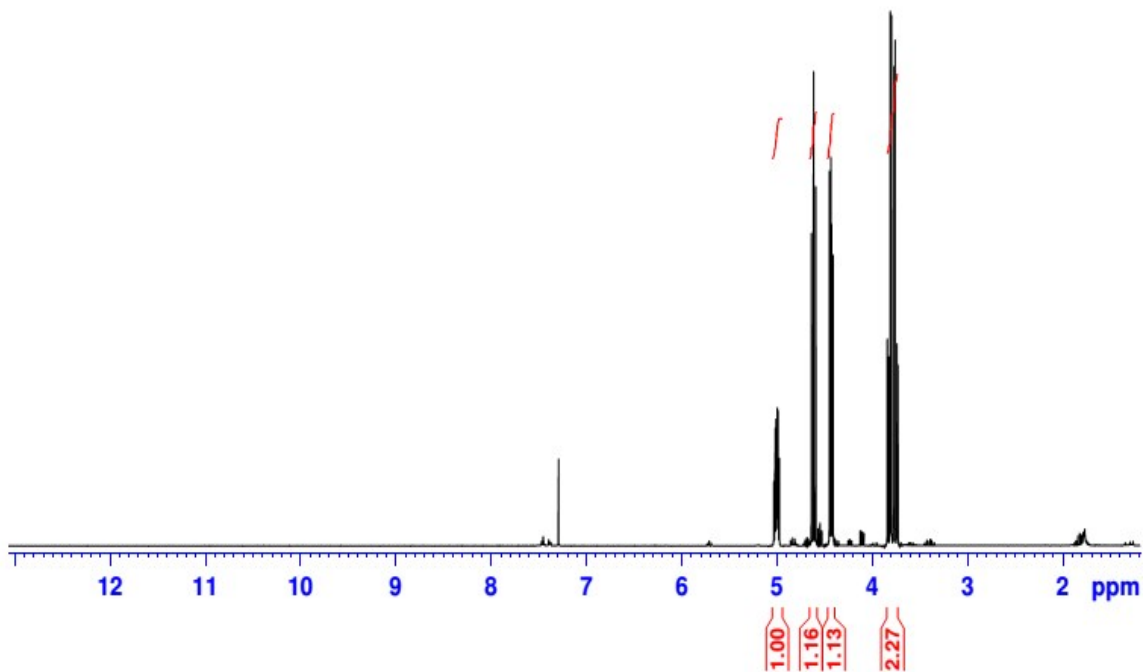

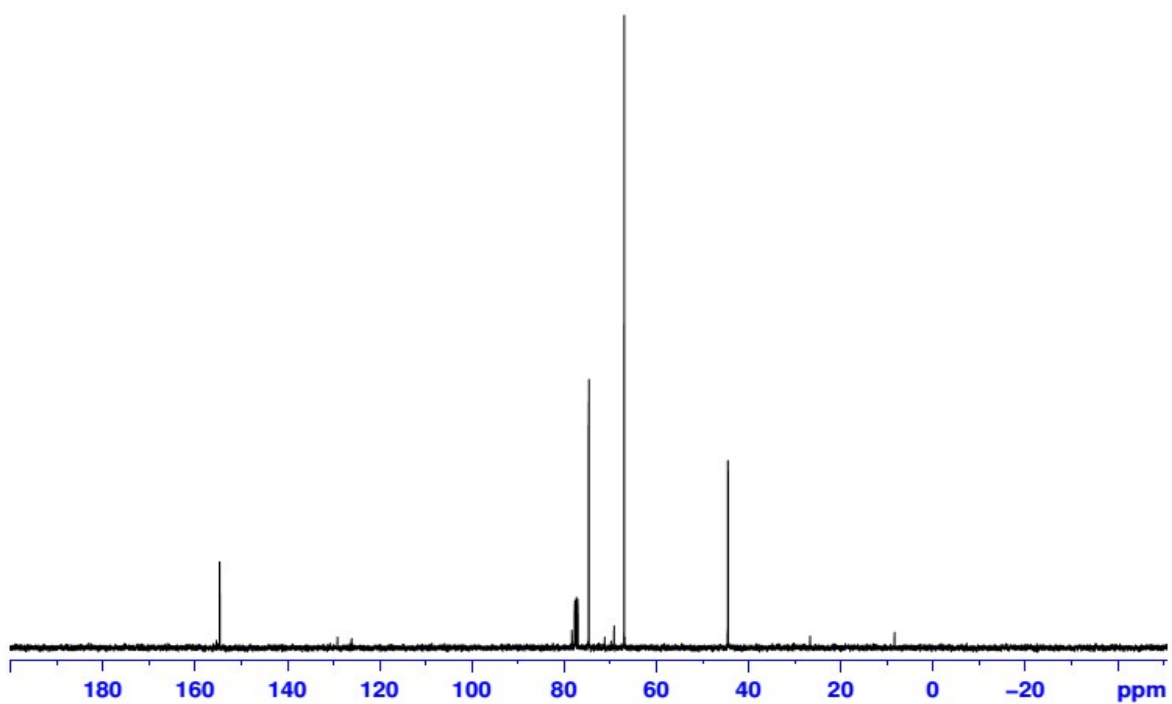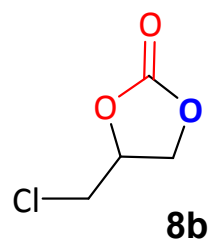

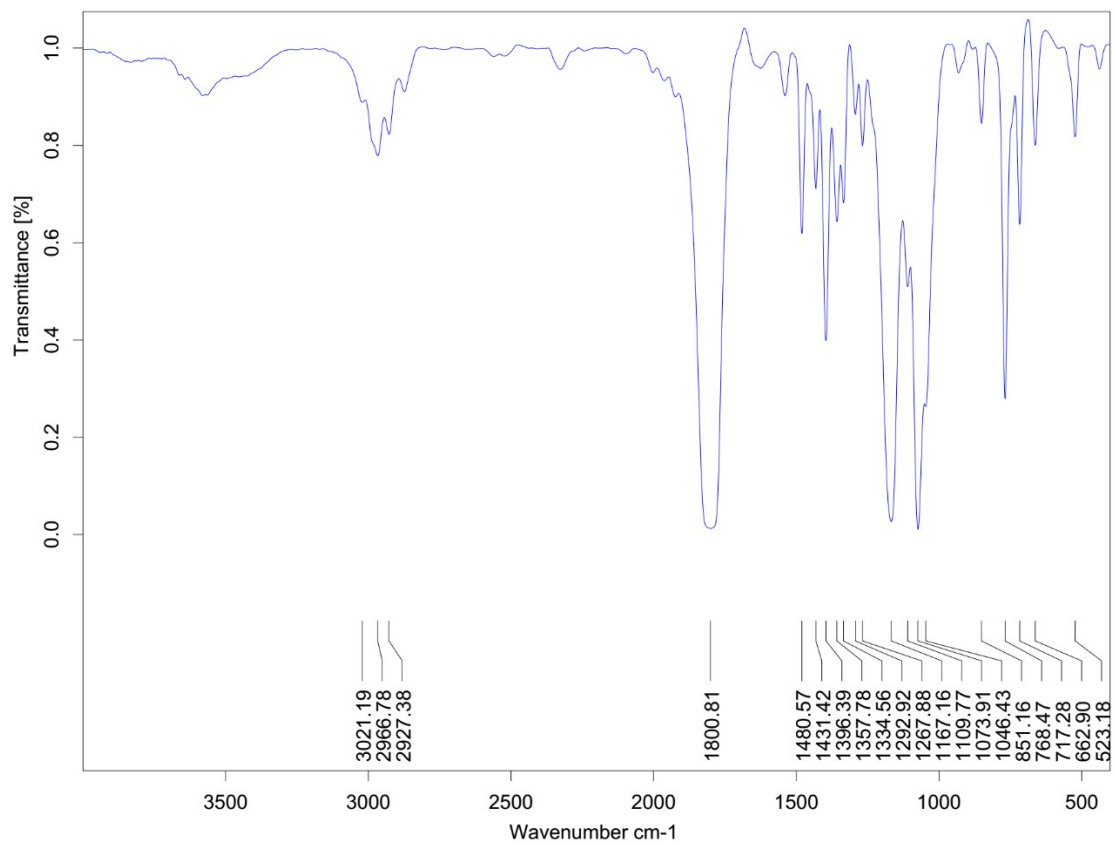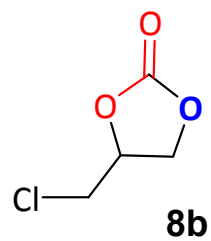

(9b) 4-ethyl-1,3-dioxolan-2-one

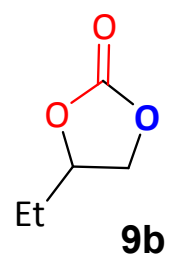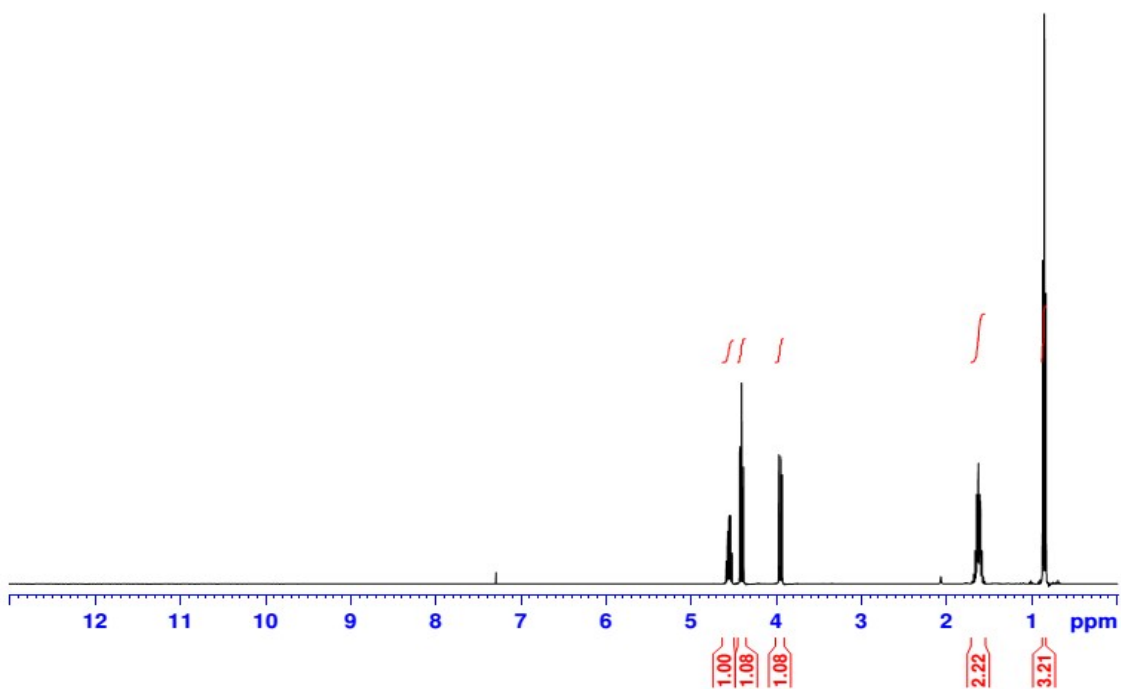

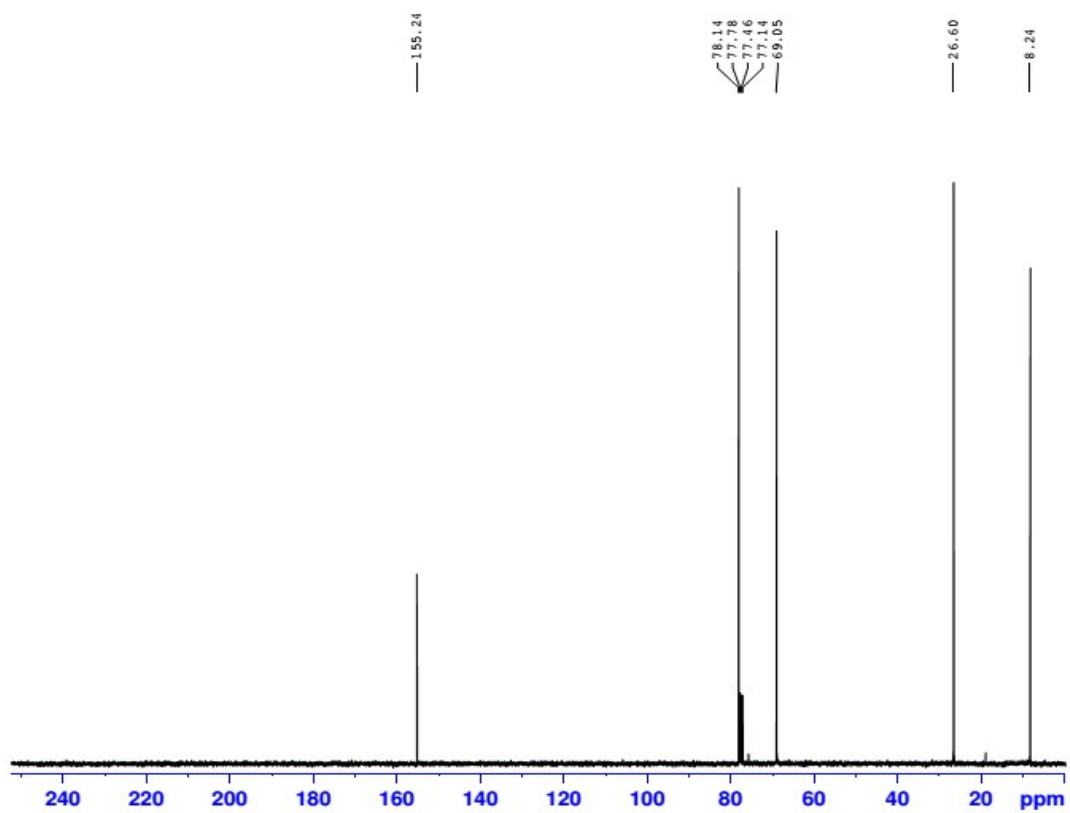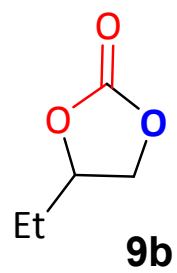

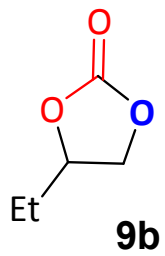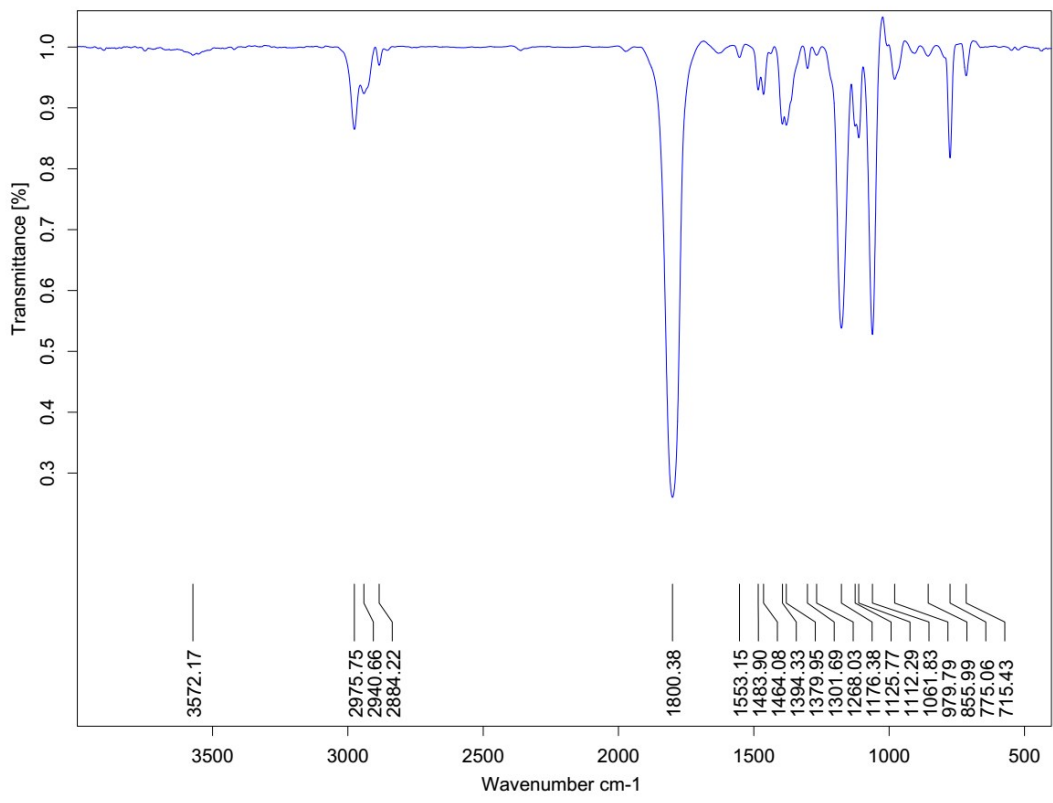



(10b) 4-(phenoxyethyl)-1,3-dioxolan-2-one was isolated as a white powder. mp: 108 °C

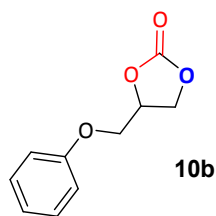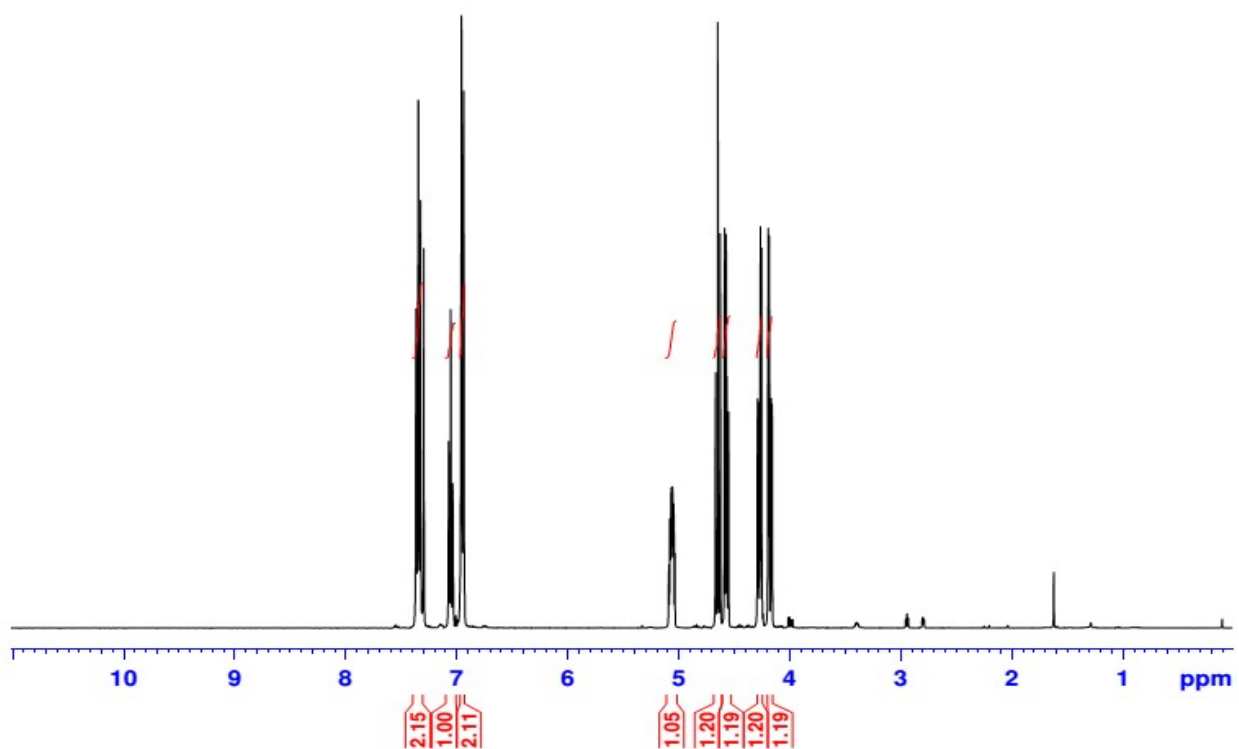

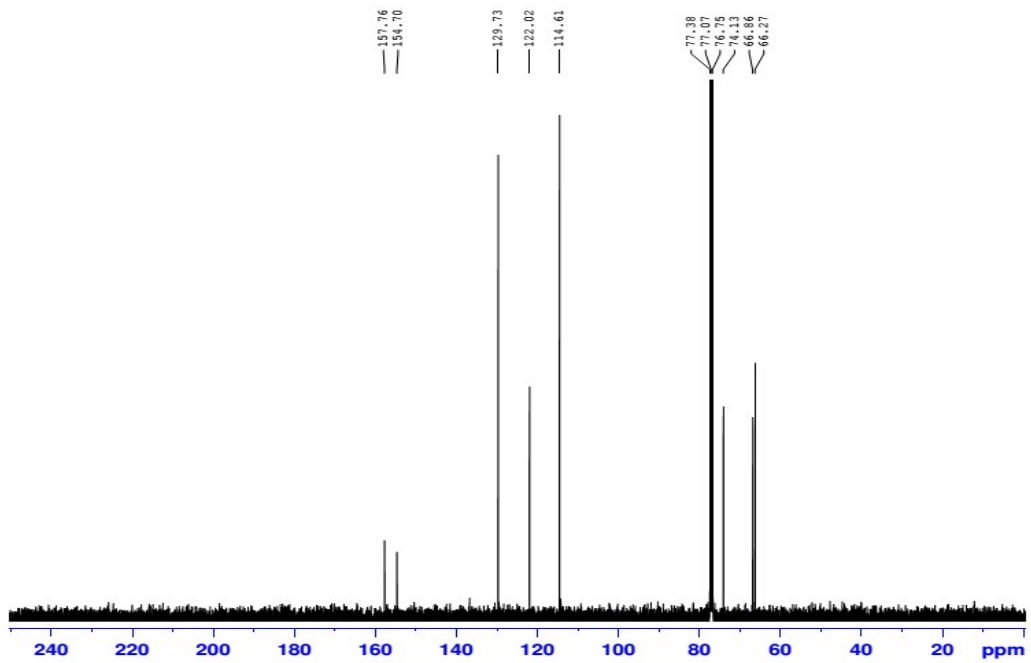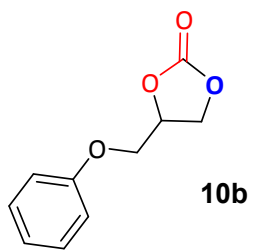

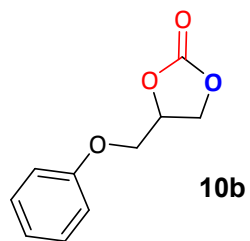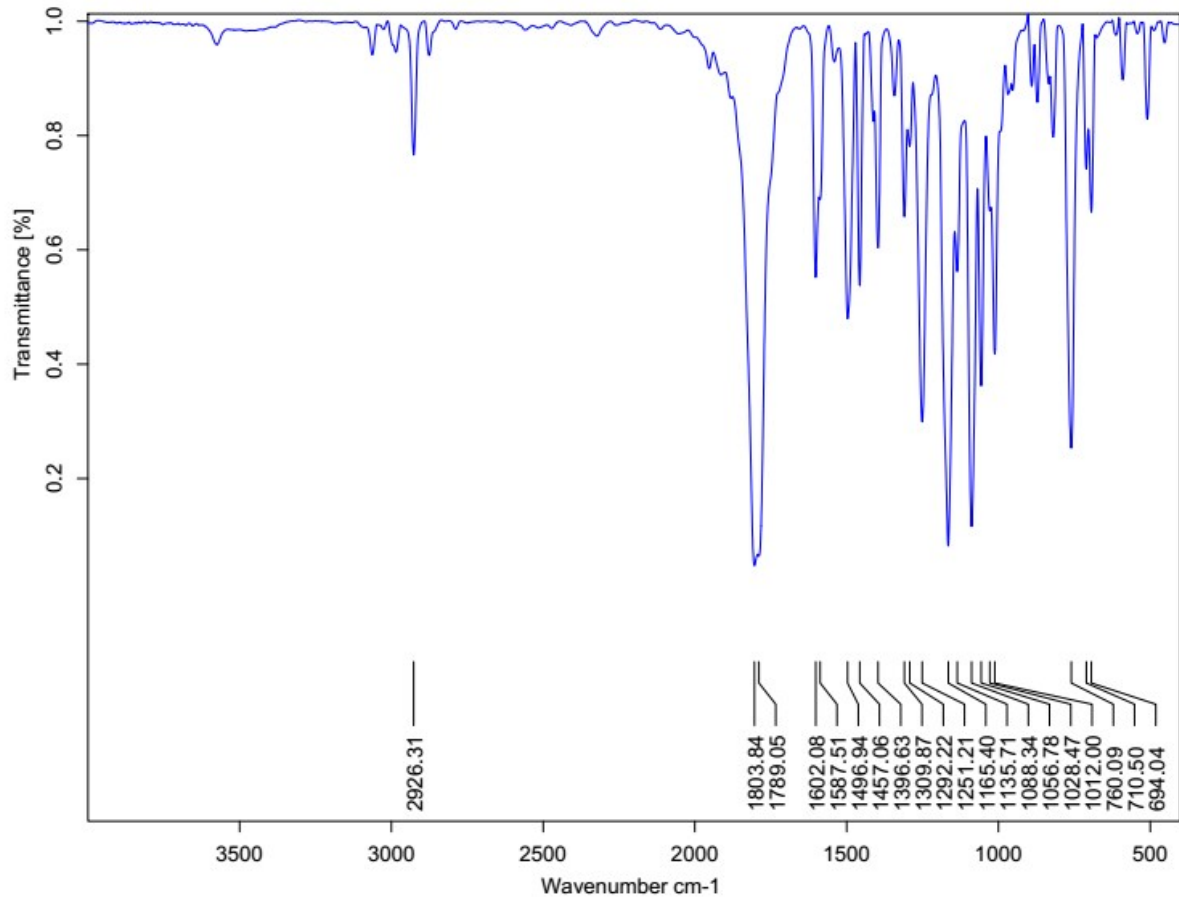

(11b) 4,4'-((butane-1,4-diylbis(oxy))bis(methylene))bis(1,3-dioxolan-2-one)

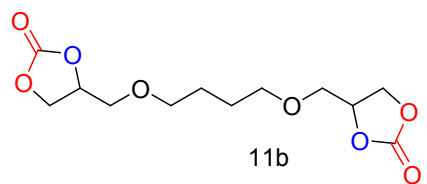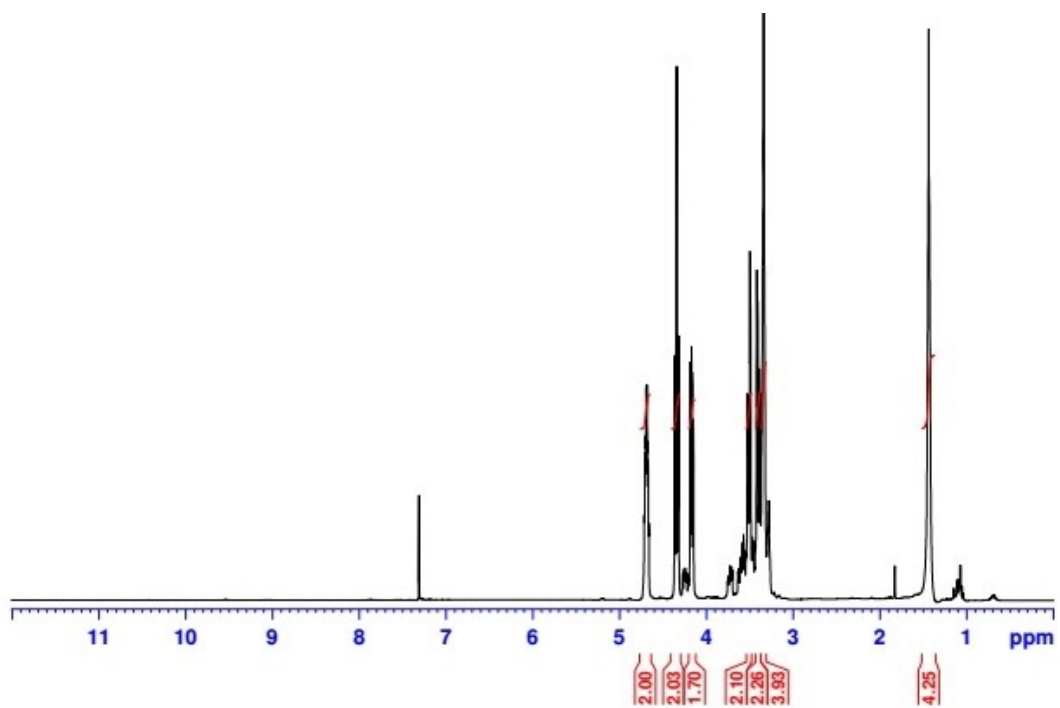

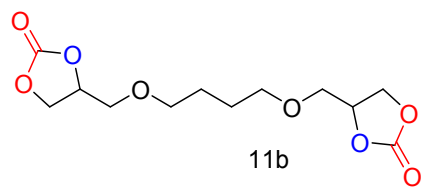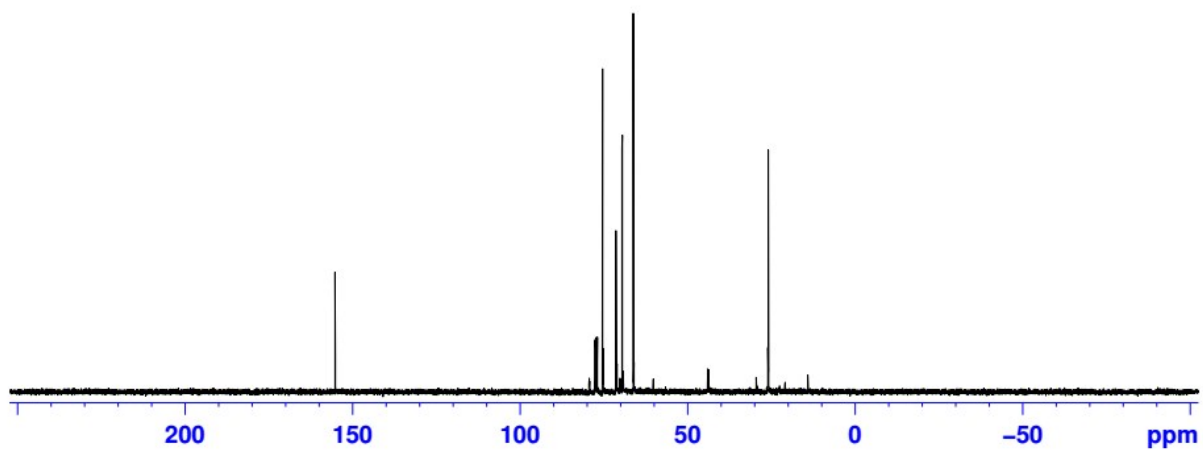

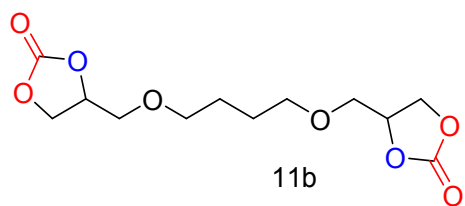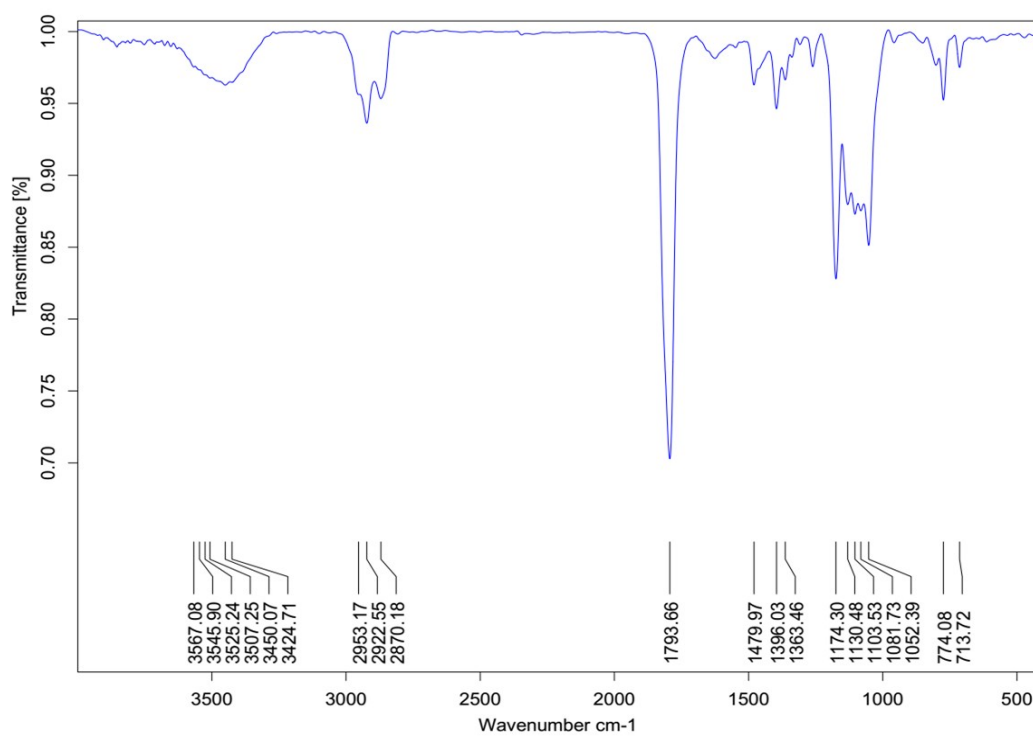

(12b) hexahydrobenzo[d][1,3]dioxol-2-one

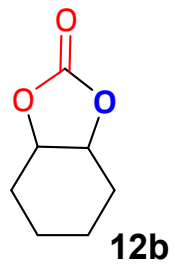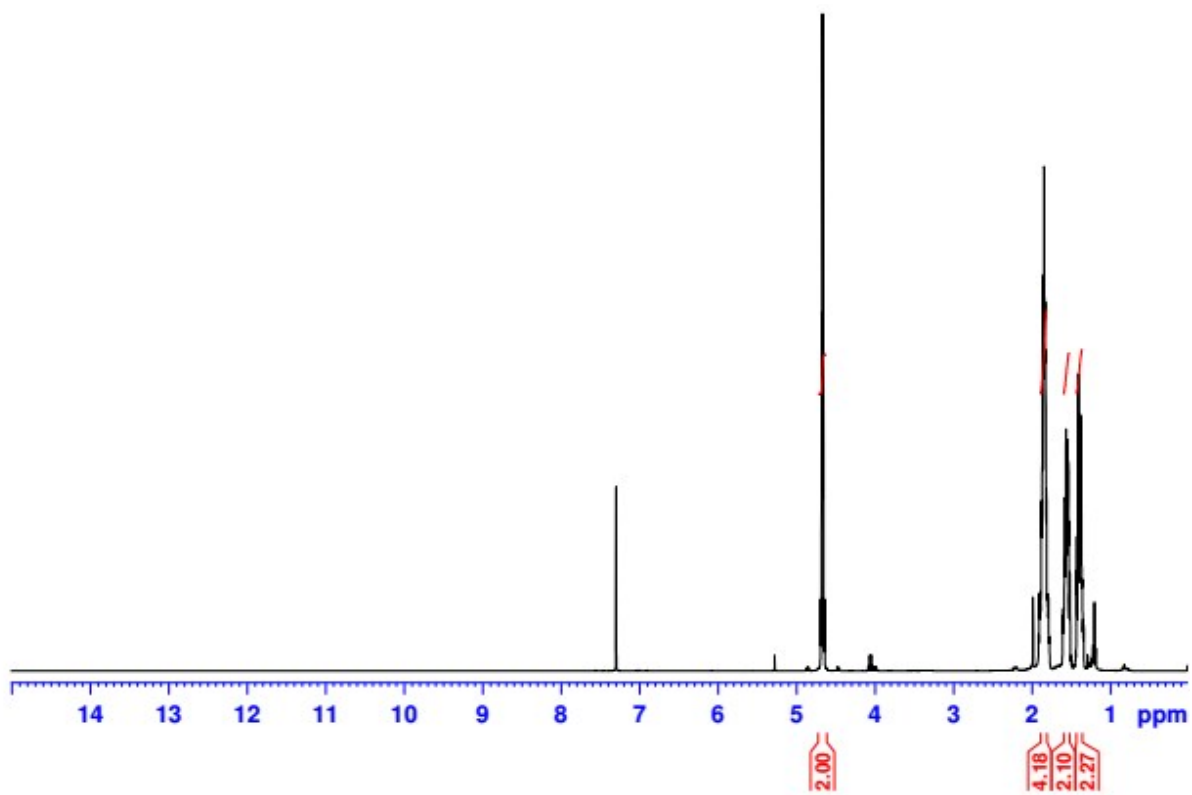

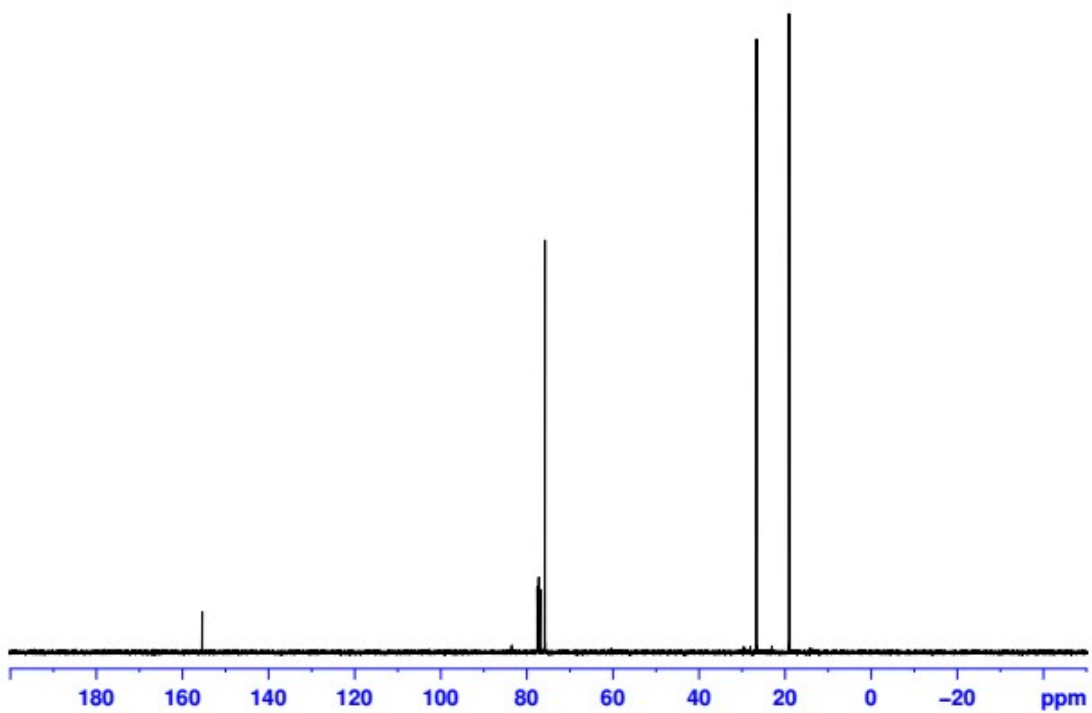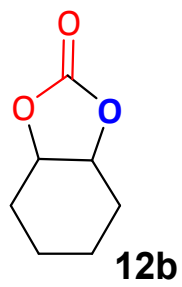



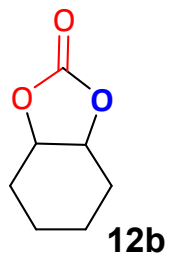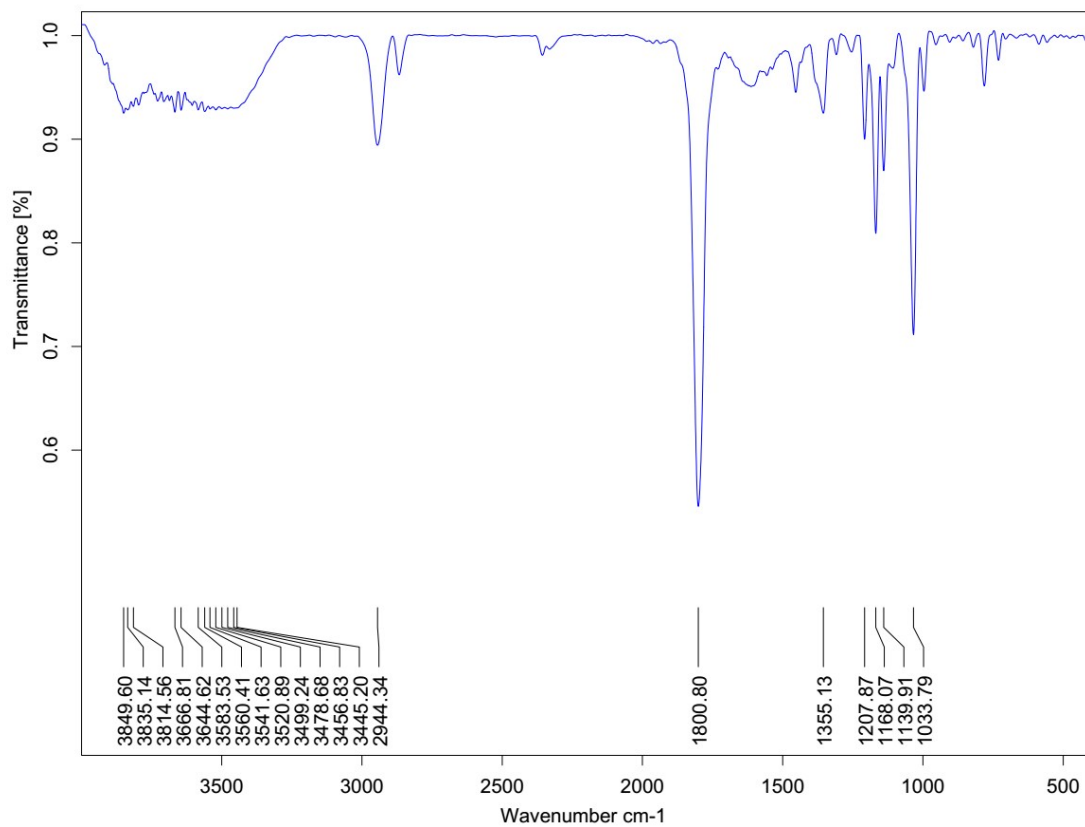

**Figure S20.** <sup>1</sup>H NMR, <sup>13</sup>C NMR and FTIR-spectra of cyclic carbonates
